# Supplementary material for: Chlorinated cobalt alkyne complexes derived from acetylsalicylic acid as new specific antitumor agents
Source: Royal Society of Chemistry journal article supplement (doi:10.1039/c7dt04790h), 2018-01-01

## Supporting Information

# Chlorinated cobalt alkyne complexes derived from acetylsalicylic acid as new specific antitumor agents

*Victoria Obermoser<sup>†‡</sup>, Daniel Baecker<sup>†‡</sup>, Carina Schuster<sup>†</sup>, Valentin Braun<sup>†</sup>, Brigitte  
Kircher<sup>§‡</sup>, Ronald Gust<sup>†\*</sup>*

<sup>†</sup> Department of Pharmaceutical Chemistry, Institute of Pharmacy, Center for Molecular  
Biosciences Innsbruck, University of Innsbruck, CCB – Centrum for Chemistry and  
Biomedicine, Innrain 80-82, 6020 Innsbruck, Austria

<sup>§</sup> Immunobiology and Stem Cell Laboratory, Department of Internal Medicine V  
(Hematology and Oncology), Innsbruck Medical University, Anichstrasse 35, 6020  
Innsbruck, Austria

<sup>‡</sup> Tyrolean Cancer Research Institute, Innrain 66, 6020 Innsbruck, Austria

<sup>‡</sup> these authors contributed equally to the publication

\* corresponding author: Ronald Gust, e-mail address: [Ronald.Gust@uibk.ac.at](mailto:Ronald.Gust@uibk.ac.at), phone: +43-  
512-507-58200

## Table of Contents

|                                                                                  |     |
|----------------------------------------------------------------------------------|-----|
| Synthesis and characterization of intermediate products                          | S3  |
| Table S1: Inhibition of COX-1/2                                                  | S6  |
| Table S2: Graphite furnace time-temperature program for Co analysis by HR CS AAS | S7  |
| Supporting Figure 1: Proliferation of HT-29 cells                                | S8  |
| Supporting Figure 2: Proliferation of MDA-MB-231 cells                           | S8  |
| Supporting Figure 3: Proliferation of MCF-7 cells                                | S8  |
| Supporting Figure 4: Caspase-3/7 induction (HT-29)                               | S9  |
| Supporting Figure 5: Caspase-3/7 induction (MCF-7)                               | S9  |
| Supporting Figure 6: Caspase-3/7 induction (MDA-MB-231)                          | S10 |
| Table S3: Solvent gradient for stability analysis with HPLC                      | S11 |
| Supporting Figure 7: Stability of 3-Cl-ASS                                       | S12 |
| Supporting Figure 8: Stability of 4-Cl-ASS                                       | S14 |
| Supporting Figure 9: Stability of 5-Cl-ASS                                       | S16 |
| Supporting Figure 10: Stability of 6-Cl-ASS                                      | S18 |
| Supporting Figure 11: Stability of 3-Cl-ASS propargyl ester                      | S20 |
| Supporting Figure 12: Stability of 4-Cl-ASS propargyl ester                      | S22 |
| Supporting Figure 13: Stability of 5-Cl-ASS propargyl ester                      | S24 |
| Supporting Figure 14: Stability of 6-Cl-ASS propargyl ester                      | S26 |
| Supporting Figure 15: <sup>1</sup> H-NMR spectrum of 3-Cl-Co-ASS                 | S28 |
| Supporting Figure 16: <sup>1</sup> H-NMR spectrum of 4-Cl-Co-ASS                 | S29 |
| Supporting Figure 17: <sup>1</sup> H-NMR spectrum of 5-Cl-Co-ASS                 | S30 |
| Supporting Figure 18: <sup>1</sup> H-NMR spectrum of 6-Cl-Co-ASS                 | S31 |
| Supporting Figure 19: HPLC chromatogram of 3-Cl-Co-ASS                           | S32 |
| Supporting Figure 20: HPLC chromatogram of 4-Cl-Co-ASS                           | S33 |
| Supporting Figure 21: HPLC chromatogram of 5-Cl-Co-ASS                           | S34 |
| Supporting Figure 22: HPLC chromatogram of 6-Cl-Co-ASS                           | S35 |
| Supporting Figure 23: HR-MS spectrum of 3-Cl-Co-ASS                              | S36 |
| Supporting Figure 24: HR-MS spectrum of 4-Cl-Co-ASS                              | S37 |
| Supporting Figure 25: HR-MS spectrum of 5-Cl-Co-ASS                              | S38 |
| Supporting Figure 26: HR-MS spectrum of 6-Cl-Co-ASS                              | S39 |

## Synthesis and characterization of intermediate products

### 6-Chlorosalicylic acid

From 4.0 g 2-chloro-6-fluorobenzoic acid (22.9 mmol), 3.7 g NaOH (91.7 mmol) and 45 ml anhydrous DMSO as solvent (12 h, 130 °C). After cooling to room temperature, the reaction mixture was diluted with 100 ml water and acidified with 1M HCl (pH 1). Water phase was extracted four times with 100 mL diethyl ether. Collected ether phases were washed with water and saturated NaCl solution and dried over NaSO<sub>4</sub>. Diethyl ether was removed under reduced pressure. Purification: recrystallization from toluene; white solid; yield: 2.34 g (13.56 mmol, 59%); mp 122 °C.

<sup>1</sup>H-NMR (200 MHz, CDCl<sub>3</sub>): δ 7.37 (dd, <sup>3</sup>J = 8.1 Hz, 1H, ArH-4), 7.02 (dd, <sup>3</sup>J = 8.0 Hz, <sup>4</sup>J = 0.8 Hz, 1H, ArH), 6.96 (dd, <sup>3</sup>J = 8.0 Hz, <sup>4</sup>J = 0.8 Hz, 1H, ArH); IR (ν cm<sup>-1</sup>): 3100-2300 br (OH), 1630 s (C=O), 1590 s, 1564 s (C=C), 1223 s, 1192 s (C-O).

### General procedure for the synthesis of chloroacetylsalicylic acids

1.0 g of chlorosalicylic acid (5.8 mmol) was dissolved in 20 ml of THF and added dropwise under cooling to a mixture of 20 ml of THF, 58 mmol acetic anhydride and 11.6 mmol of TEA. The mixture was stirred at room temperature until reaction was completed. 80 ml water was added and the reaction mixture was acidified with 1M HCl, then extracted three times with 50 ml of diethyl ether. Collected ether phases were washed with water and saturated NaCl solution and removed under reduced pressure. If necessary, product was purified with column chromatography prior to recrystallization. The product was recrystallized from toluene or a toluene-petroleum mixture.

### 3-Chloroacetylsalicylic acid (3-Cl-ASS)

Reaction time: 22.5 h; purification: recrystallization from petroleum/toluene (2:1); white solid; yield: 0.94 g (4.38 mmol, 76%); mp 122 °C.

<sup>1</sup>H-NMR (200 MHz, CDCl<sub>3</sub>): δ 8.02 (dd, <sup>3</sup>J = 8.0 Hz, <sup>4</sup>J = 1.8 Hz, 1H, ArH-6), 7.70 (dd, <sup>3</sup>J = 8.4 Hz, <sup>4</sup>J = 1.8 Hz, 1H, ArH-4), 7.31 (dd, <sup>3</sup>J = 7.8 Hz, 1H, ArH-5), 2.40 (s, 3H, CH<sub>3</sub>); IR (ν cm<sup>-1</sup>): 3100-2400 br (OH), 1774 s, 1686 s (C=O), 1592 m, 1568 w (C=C), 1366 m (δ CH<sub>3</sub>), 1274 m, 1181 s (C-O).

### 4-Chloroacetylsalicylic acid (4-Cl-ASS)

Reaction time: 19 h; purification: recrystallization from petroleum/toluene (2:1); white solid; yield: 1.06 g (4.94 mmol, 85%); mp 142 °C.

<sup>1</sup>H-NMR (200 MHz, CDCl<sub>3</sub>): δ 8.06 (d, <sup>3</sup>J = 8.6 Hz, 1H, ArH-6), 7.34 (dd, <sup>3</sup>J = 8.6 Hz, <sup>4</sup>J = 1.8 Hz, 1H, ArH-5), 7.17 (d, <sup>4</sup>J = 1.8 Hz, 1H, ArH-3), 2.34 (s, 3H, CH<sub>3</sub>); IR (ν cm<sup>-1</sup>): 3100-2400 br (OH), 1759 s, 1684 s (C=O), 1594 m (C=C), 1366 m (δ CH<sub>3</sub>), 1278 s, 1188 s (C-O).

#### 5-Chloroacetylsalicylic acid (5-Cl-ASS)

Reaction time: 3 h; purification: recrystallization from toluene; white solid; yield: 0.84 g (3.91 mmol, 68%); mp 142 °C.

<sup>1</sup>H-NMR (200 MHz, CDCl<sub>3</sub>): δ 8.09 (d, <sup>4</sup>J = 2.4 Hz, 1H, ArH-6), 7.58 (dd, <sup>3</sup>J = 8.4 Hz, <sup>4</sup>J = 2.4 Hz, 1H, ArH-4), 7.10 (d, <sup>3</sup>J = 8.4 Hz, 1H, ArH-3), 2.34 (s, 3H, CH<sub>3</sub>); IR (ν cm<sup>-1</sup>): 3100-2400 br (OH), 1751 s, 1688 s (C=O), 1600 m, 1562 m (C=C), 1364 m (δ CH<sub>3</sub>), 1303 s, 1193 s, 1102 s (C-O).

#### 6-Chloroacetylsalicylic acid (6-Cl-ASS)

Reaction time: 20 h; purification: column chromatography using ethyl acetate/petroleum/glacial acetic acid (8:6:0.5), recrystallization from petroleum/toluene (2:1); white solid; yield: 0.92 g (4.29 mmol, 74%); mp 121 °C.

<sup>1</sup>H-NMR (200 MHz, CDCl<sub>3</sub>): δ 7.43 (dd, <sup>3</sup>J = 8.0 Hz, 1H, ArH-4), 7.36 (dd, <sup>3</sup>J = 8.0 Hz, <sup>4</sup>J = 1.8 Hz, 1H, ArH-5), 7.12 (dd, <sup>3</sup>J = 7.6 Hz, <sup>4</sup>J = 1.8 Hz, 1H, ArH-3), 2.31 (s, 3H, CH<sub>3</sub>); IR (ν cm<sup>-1</sup>): 3100-2700 br (OH), 1771 s, 1716 s, 1651 m (C=O), 1596 s, 1576 m (C=C), 1365 m (δ CH<sub>3</sub>), 1258 s, 1179 s (C-O).

#### General procedure for the synthesis of chloroacetylsalicylic acid propargyl ester

The Cl-ASS derivative was dissolved in 10 ml anhydrous DCM. 0.2 equivalent DMAP and 1.1 equivalent propargyl alcohol were added under stirring, followed by the addition of 1.1 equivalent DCC under ice cooling. After 5 min of vigorous stirring, the ice bath was removed and reaction mixture was stirred at room temperature for 2 – 3 h. A white precipitate was built (dicyclohexylurea, DCU), which was removed by filtration. The basic solvent was evaporated, the residue was dissolved in DCM and if necessary filtrated again. DCM phase was washed twice with 0.5M HCl and saturated NaHCO<sub>3</sub> solution, dried over NaSO<sub>4</sub> and evaporated under reduced pressure. As resulting yellowish oil is a mixture of the salicylic acid ester and the acetylsalicylic acid ester, acetylation was carried out again.

#### General procedure for the (re-)acetylation of chlorosalicylic acid propargyl ester

The (re-)acetylation was conducted analogously to the synthesis of chloroacetylsalicylic acids. Although, the starting material was a mixture of salicylic acid and acetylsalicylic acid ester, calculation of reaction mixture was calculated based on the pure chlorosalicylic acid ester. Workup was performed as described in the *General procedure for the synthesis of chloroacetylsalicylic acids*, except for the acidification before extraction which was not necessary. After removal of the solvent under reduced pressure, possibly generated DCU crystals were removed by filtration after dissolution in toluene. Toluene was removed under reduced pressure, a yellowish solid crystallizes, which was resuspended in petroleum. The product was collected on a frit and washed with petroleum.

2-Acetoxy-3-chlorobenzoic acid prop-2-ynyl ester (3-Cl-ASS propargyl ester)

From 0.70 g 3-chloroacetylsalicylic acid (3.26 mmol), 0.21 ml propargyl alcohol (3.59 mmol), 0.74 g DCC (3.59 mmol) and 0.08 g DMAP (0.65 mmol). White crystalline solid; yield: 0.59 g (2.34 mmol, 67%); mp 61 °C.

<sup>1</sup>H-NMR (200 MHz, CDCl<sub>3</sub>): δ 8.01 (d, <sup>3</sup>J = 8.8 Hz, 1H, ArH-6), 7.31 (dd, <sup>3</sup>J = 8.4 Hz, <sup>4</sup>J = 2.2 Hz, 1H, ArH-5), 7.15 (d, <sup>3</sup>J = 2.2 Hz, 1H, ArH-3), 4.87 (d, <sup>4</sup>J = 2.6 Hz, 2H, CH<sub>2</sub>), 2.54 (t, <sup>4</sup>J = 2.4 Hz, 1H, CH), 2.37 (s, 3H, CH<sub>3</sub>); IR (ν cm<sup>-1</sup>): 3249 m (C≡C-H), 3081 w (Aryl-C-H), 2944 w, 2855 w (C-H), 2129 w (C≡C), 1761 s, 1718 s (C=O), 1600 s, 1568 m (C=C), 1372 m (δ -CH<sub>3</sub>), 1262 s, 1202 s, 1099 s (C-O).

2-Acetoxy-4-chlorobenzoic acid prop-2-ynyl ester (4-Cl-ASS propargyl ester)

From 0.70 g 4-chloroacetylsalicylic acid (3.26 mmol), 0.21 ml propargyl alcohol (3.59 mmol), 0.74 g DCC (3.59 mmol) and 0.08 g DMAP (0.65 mmol). White crystalline solid; yield: 0.50 g (1.98 mmol, 51%); mp 49 °C.

<sup>1</sup>H-NMR (200 MHz, CDCl<sub>3</sub>): δ 8.01 (d, <sup>3</sup>J = 8.8 Hz, 1H, ArH-6), 7.31 (dd, <sup>3</sup>J = 8.4 Hz, <sup>4</sup>J = 2.2 Hz, 1H, ArH-5), 7.15 (d, <sup>3</sup>J = 2.2 Hz, 1H, ArH-3), 4.87 (d, <sup>4</sup>J = 2.6 Hz, 2H, CH<sub>2</sub>), 2.54 (t, <sup>4</sup>J = 2.4 Hz, 1H, CH), 2.37 (s, 3H, CH<sub>3</sub>); IR (ν cm<sup>-1</sup>): 3249 m (C≡C-H), 3081 w (Aryl-C-H), 2944 w, 2855 w (C-H), 2129 w (C≡C), 1761 s, 1718 s (C=O), 1600 s, 1568 m (C=C), 1372 m (δ -CH<sub>3</sub>), 1262 s, 1202 s, 1099 s (C-O).

2-Acetoxy-5-chlorobenzoic acid prop-2-ynyl ester (5-Cl-ASS propargyl ester)

From 0.80 g 5-chloroacetylsalicylic acid (3.73 mmol), 0.24 ml propargyl alcohol (4.10 mmol), 0.85 g DCC (4.10 mmol) and 0.09 g DMAP (0.65 mmol). White crystalline solid; yield: 0.60 g (2.37 mmol, 64%); mp 55 °C.

<sup>1</sup>H-NMR (200 MHz, CDCl<sub>3</sub>): δ 8.03 (d, <sup>4</sup>J = 3.0 Hz, 1H, ArH-6), 7.54 (dd, <sup>3</sup>J = 8.8 Hz, <sup>4</sup>J = 3.0 Hz, 1H, ArH-4), 7.07 (d, <sup>3</sup>J = 8.8 Hz, 1H, ArH-3), 4.88 (d, <sup>4</sup>J = 2.4 Hz, 2H, CH<sub>2</sub>), 2.55 (t, <sup>4</sup>J = 2.5 Hz, 1H, CH), 2.37 (s, 3H, CH<sub>3</sub>); IR (ν cm<sup>-1</sup>): 3246 m (C≡C-H), 3116 w, 3068 w (Aryl-C-H), 2931 w, 2850 w (C-H), 2128 w (C≡C), 1749 s, 1720 s (C=O), 1601 w, 1574 w (C=C), 1370 m (δ -CH<sub>3</sub>), 1202 s, 1081 s (C-O).

2-Acetoxy-6-chlorobenzoic acid prop-2-ynyl ester (6-Cl-ASS propargyl ester)

From 0.47 g 6-chloroacetylsalicylic acid (2.19 mmol), 0.14 ml propargyl alcohol (2.41 mmol), 0.50 g DCC (2.41 mmol) and 0.05 g DMAP (0.44 mmol). White crystalline solid; yield: 0.23 g (0.91 mmol, 35%); mp 68 °C.

<sup>1</sup>H-NMR (200 MHz, CDCl<sub>3</sub>): δ 7.40 (dd, <sup>3</sup>J = 7.9 Hz, 1H, ArH-4), 7.32 (dd, <sup>3</sup>J = 8.1 Hz, <sup>4</sup>J = 1.5 Hz, 1H, ArH-3), 7.11 (dd, <sup>3</sup>J = 8.0 Hz, <sup>4</sup>J = 1.6 Hz, 1H, ArH-5), 4.93 (d, <sup>4</sup>J = 2.6 Hz, 2H, CH<sub>2</sub>), 2.55 (t, <sup>4</sup>J = 2.5 Hz, 1H, CH), 2.30 (s, 3H, CH<sub>3</sub>); IR (ν cm<sup>-1</sup>): 3252 m (C≡C-H), 3081 w (Aryl-C-H), 2960 w, 2833 w, 2850 w (C-H), 2125 w (C≡C), 1768 s, 1746 s (C=O), 1595 m, 1576 m (C=C), 1369 m (δ -CH<sub>3</sub>), 1269 s, 1182 s (C-O).

*Table S1: Inhibition of COX-1/2*

| compound           | concentration [ $\mu$ M] | COX-1 [%]      | COX-2 [%]      | PGE2 [%]       |
|--------------------|--------------------------|----------------|----------------|----------------|
| ASS                | 10 $\mu$ M               | $28.8 \pm 3.7$ | $0.6 \pm 2.8$  | $2.3 \pm 2.7$  |
| ASS                | 100 $\mu$ M              | $73.3 \pm 8.7$ | $59.4 \pm 8.7$ | $25.4 \pm 4.3$ |
| 3-Cl-ASS           | 100 $\mu$ M              | $27.0 \pm 6.1$ | $29.5 \pm 3.5$ | n. t.          |
| 4-Cl-ASS           | 100 $\mu$ M              | $60.2 \pm 6.2$ | $55.0 \pm 2.7$ | n. t.          |
| 5-Cl-ASS           | 100 $\mu$ M              | $56.4 \pm 5.7$ | $42.8 \pm 0.4$ | n. t.          |
| 6-Cl-ASS           | 100 $\mu$ M              | $30.0 \pm 2.9$ | $30.6 \pm 3.2$ | n. t.          |
| ASS-Propargyl      | 100 $\mu$ M              | $25.4 \pm 4.4$ | $34.5 \pm 4.2$ | n. t.          |
| propargyl-3-Cl-ASS | 100 $\mu$ M              | $32.5 \pm 1.9$ | $52.2 \pm 5.7$ | n. t.          |
| propargyl-4-Cl-ASS | 100 $\mu$ M              | $24.0 \pm 7.7$ | $47.2 \pm 5.3$ | n. t.          |
| propargyl-5-Cl-ASS | 100 $\mu$ M              | $34.6 \pm 0.5$ | $52.0 \pm 8.2$ | n. t.          |
| propargyl-6-Cl-ASS | 100 $\mu$ M              | $37.3 \pm 7.1$ | $47.4 \pm 6.0$ | n. t.          |
| Co-ASS             | 10 $\mu$ M               | $82.7 \pm 3.2$ | $78.5 \pm 6.1$ | $57.5 \pm 3.0$ |
| 3-Cl-Co-ASS        | 10 $\mu$ M               | $24.9 \pm 2.6$ | $71.4 \pm 8.3$ | $37.7 \pm 6.7$ |
| 4-Cl-Co-ASS        | 10 $\mu$ M               | $22.9 \pm 1.7$ | $69.9 \pm 2.7$ | $48.5 \pm 6.8$ |
| 5-Cl-Co-ASS        | 10 $\mu$ M               | $25.0 \pm 1.0$ | $64.0 \pm 7.5$ | $41.9 \pm 4.2$ |
| 6-Cl-Co-ASS        | 10 $\mu$ M               | $24.4 \pm 3.0$ | $70.5 \pm 3.5$ | $18.3 \pm 1.9$ |

*Table S2: Graphite furnace time-temperature program for Co analysis by HR CS AAS*

| step | operation   | temperature | heating rate | hold time | argon flow |
|------|-------------|-------------|--------------|-----------|------------|
| 1    | drying      | 80 °C       | 10 °C/s      | 10 s      | maximal    |
| 2    | drying      | 100 °C      | 10 °C/s      | 25 s      | maximal    |
| 3    | drying      | 120 °C      | 15 °C/s      | 10 s      | maximal    |
| 4    | pyrolysis   | 1100 °C     | 200 °C/s     | 20 s      | maximal    |
| 5    | auto-zero   | 1100 °C     | 0 °C/s       | 5 s       | stop       |
| 6    | atomization | 2300 °C     | 1500 °C/s    | 5 s       | stop       |
| 7    | cleaning    | 2600 °C     | 500 °C/s     | 4 s       | maximal    |

*Supporting Figure 1: Proliferation of HT-29 cells*

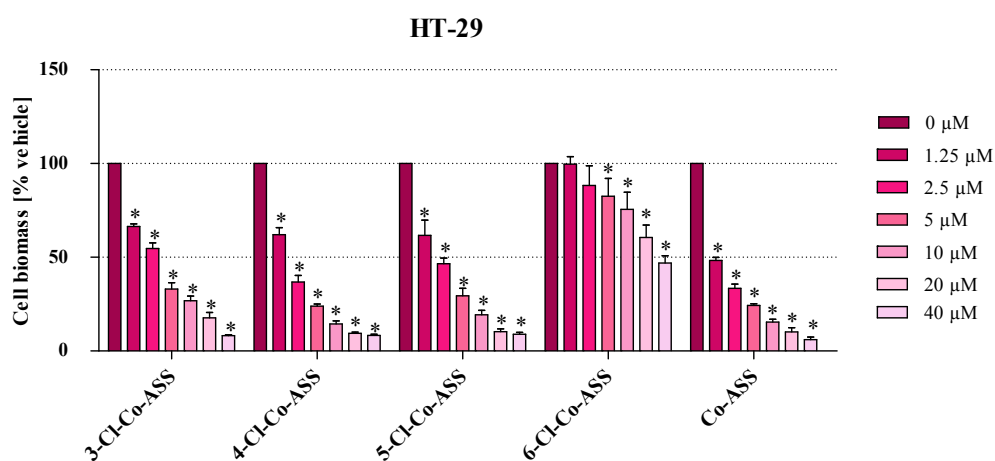

*Supporting Figure 2: Proliferation of MDA-MB-231 cells*

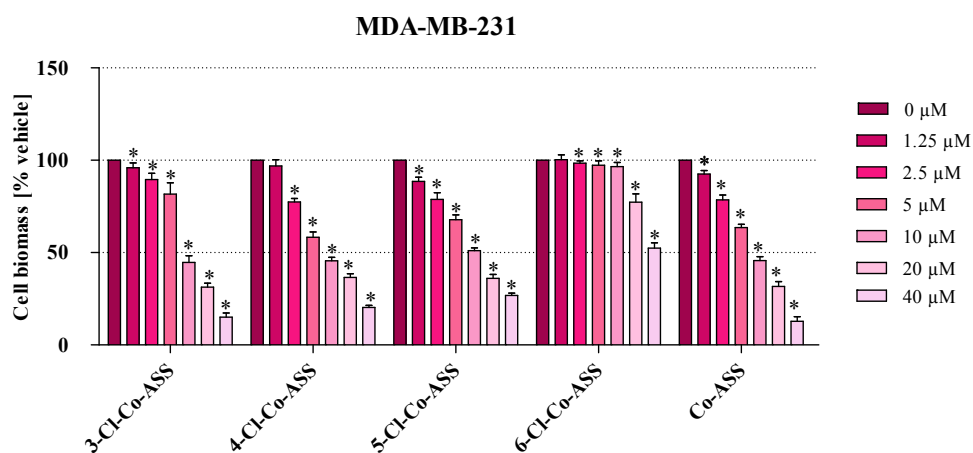

*Supporting Figure 3: Proliferation of MCF-7 cells*

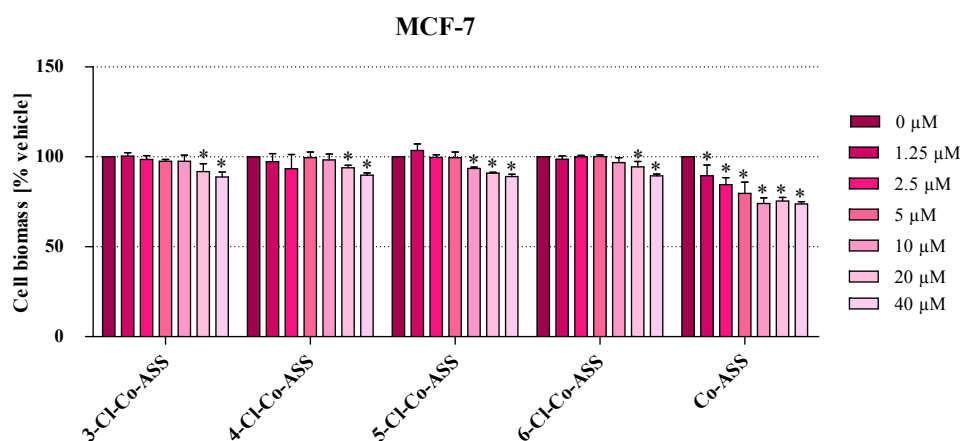



*Supporting Figure 4: Caspase-3/7 induction (HT-29)*

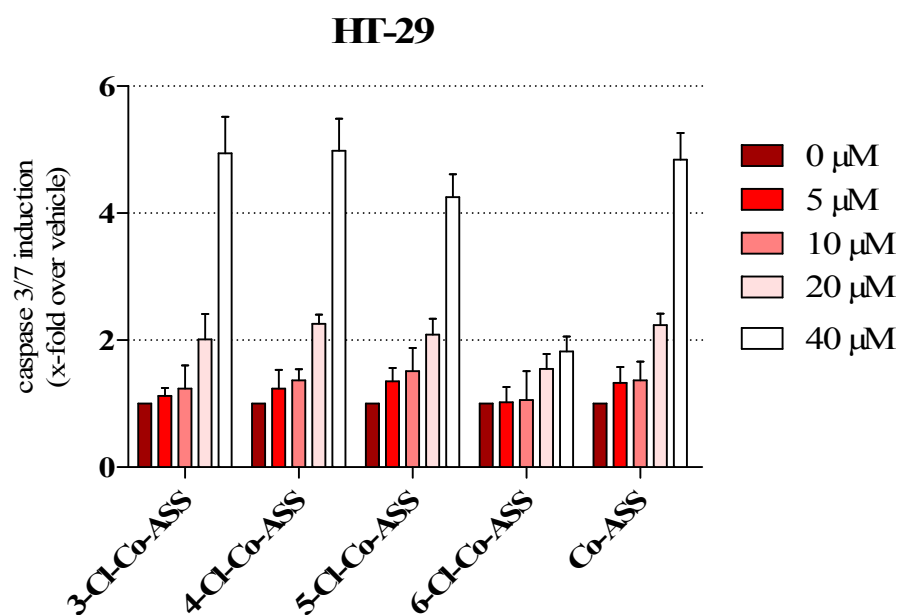

*Supporting Figure 5: Caspase-3/7 induction (MCF-7)*

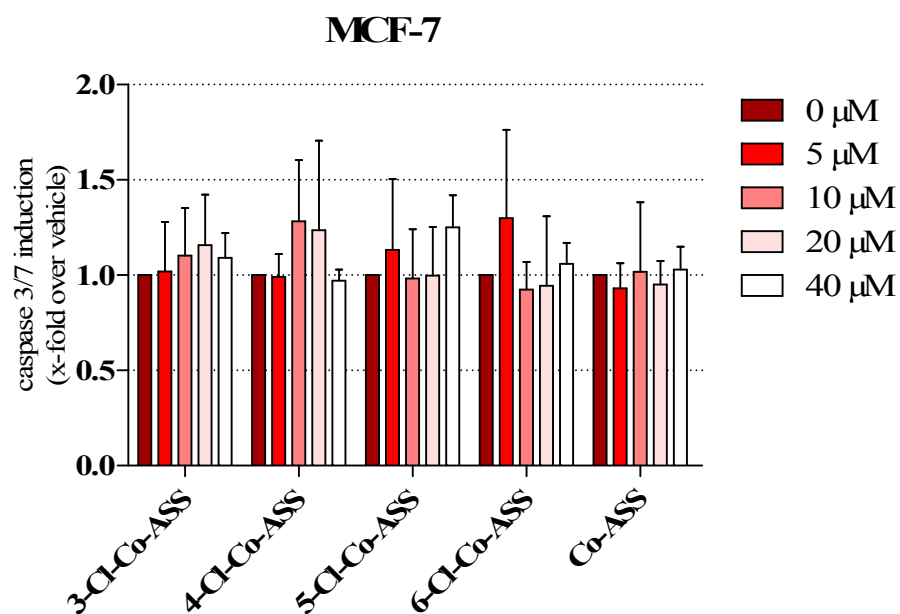

Supporting Figure 6: *Caspase-3/7 induction (MDA-MB-231)*

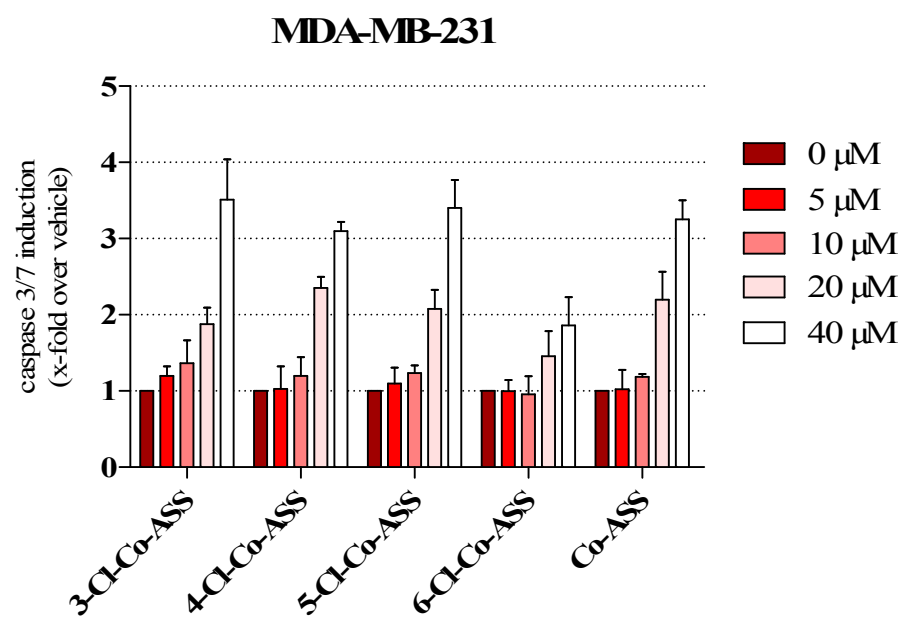

*Table S3: Solvent gradient for stability analysis with HPLC*

| compound                                                                                                   | Time [min] | ACN [%]  | AcOH (1%) [%] |
|------------------------------------------------------------------------------------------------------------|------------|----------|---------------|
| 3-Cl-ASS, 4-Cl-ASS, 5-Cl-ASS, 3-Cl-ASS propargyl ester, 4-Cl-ASS propargyl ester, 5-Cl-ASS propargyl ester | 0 – 2      | 40       | 60            |
|                                                                                                            | 2 – 6      | 40 – 60  | 60 – 40       |
|                                                                                                            | 6 – 11     | 60 – 100 | 40 – 0        |
|                                                                                                            | 11 – 11.5  | 100      | 0             |
|                                                                                                            | 11.5 – 15  | 40       | 60            |
| 6-Cl-ASS, 6-Cl-ASS propargyl ester                                                                         | 0 – 2      | 20       | 80            |
|                                                                                                            | 2 – 6      | 20 – 40  | 80 – 60       |
|                                                                                                            | 6 – 11     | 40 – 90  | 60 – 10       |
|                                                                                                            | 11 – 11.5  | 90 – 20  | 10 – 80       |
|                                                                                                            | 11.5 – 15  | 20       | 80            |

Supporting Figure 7: Stability of 3-Cl-ASS

**0 Stunden**

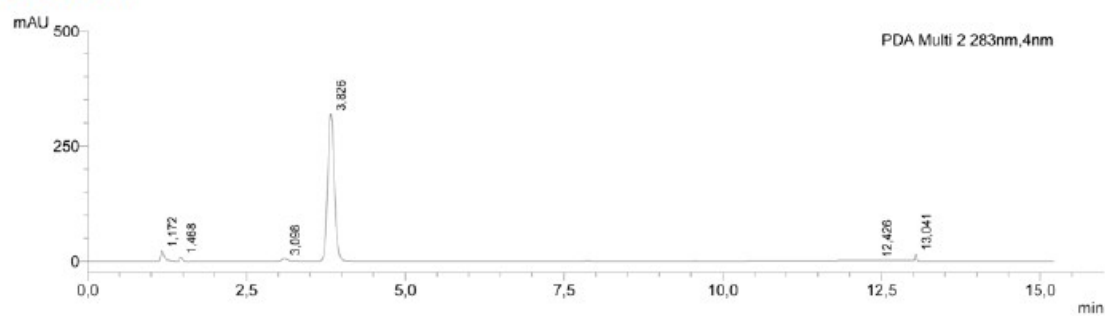

**8 Stunden**

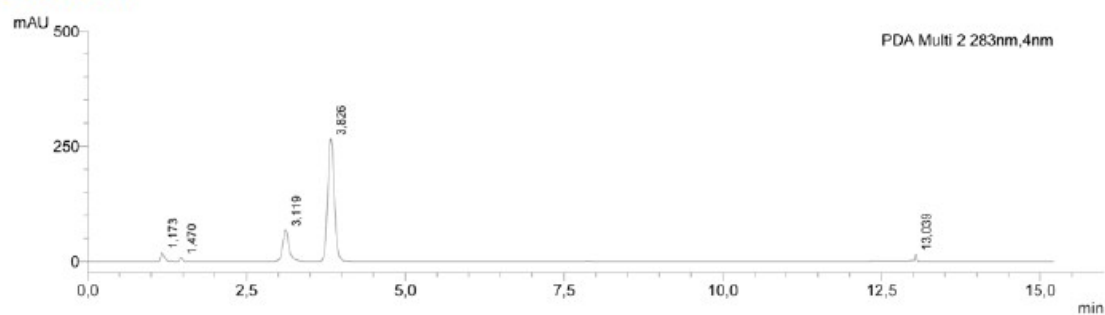

**24 Stunden**

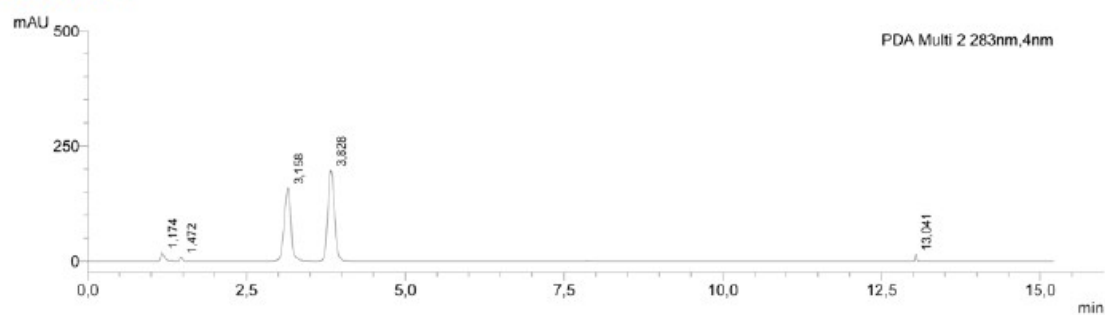

#### 48 Stunden

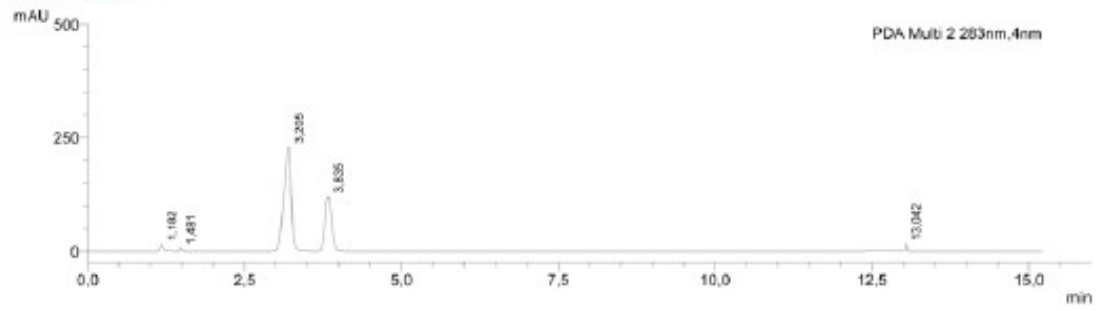

#### 72 Stunden

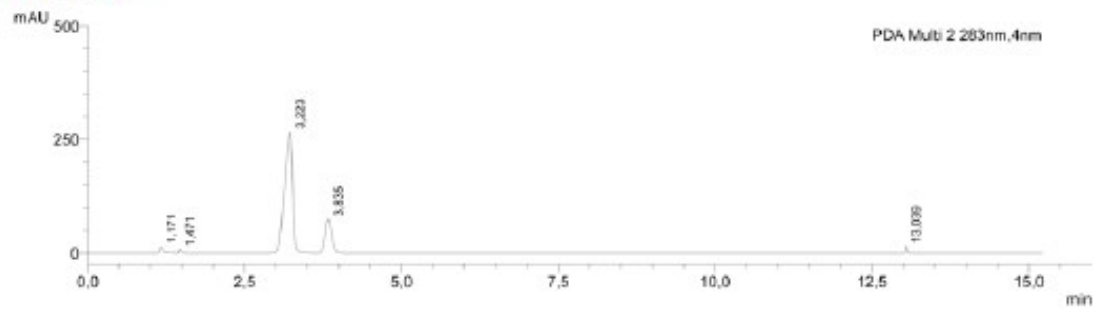

#### 96 Stunden

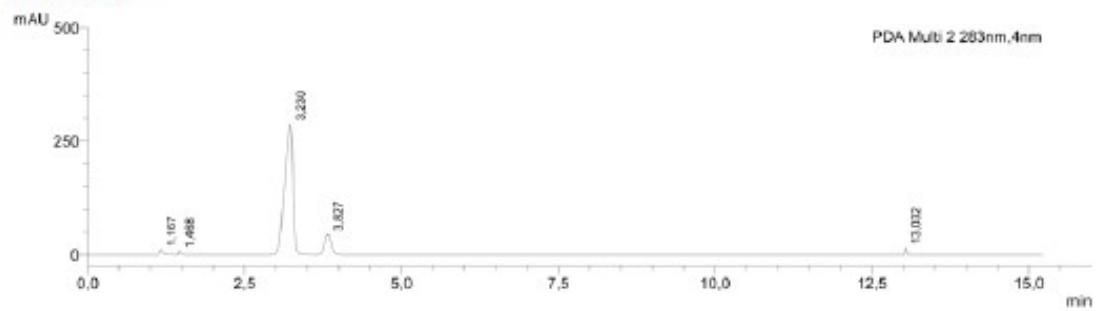

#### 168 Stunden

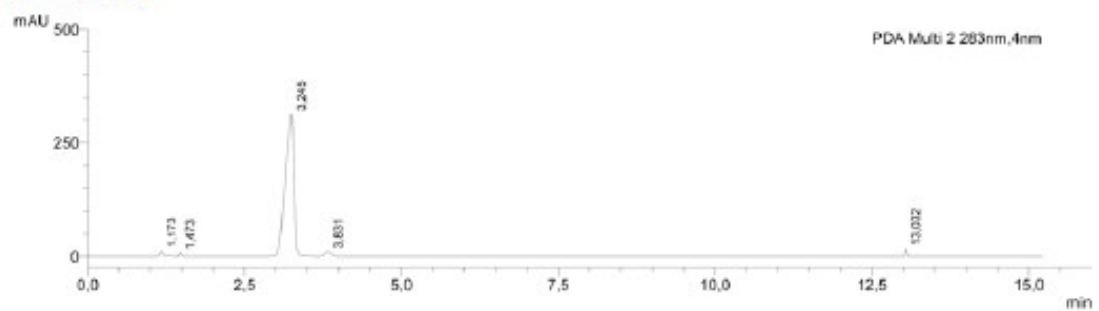

*Supporting Figure 8: Stability of 4-Cl-ASS*

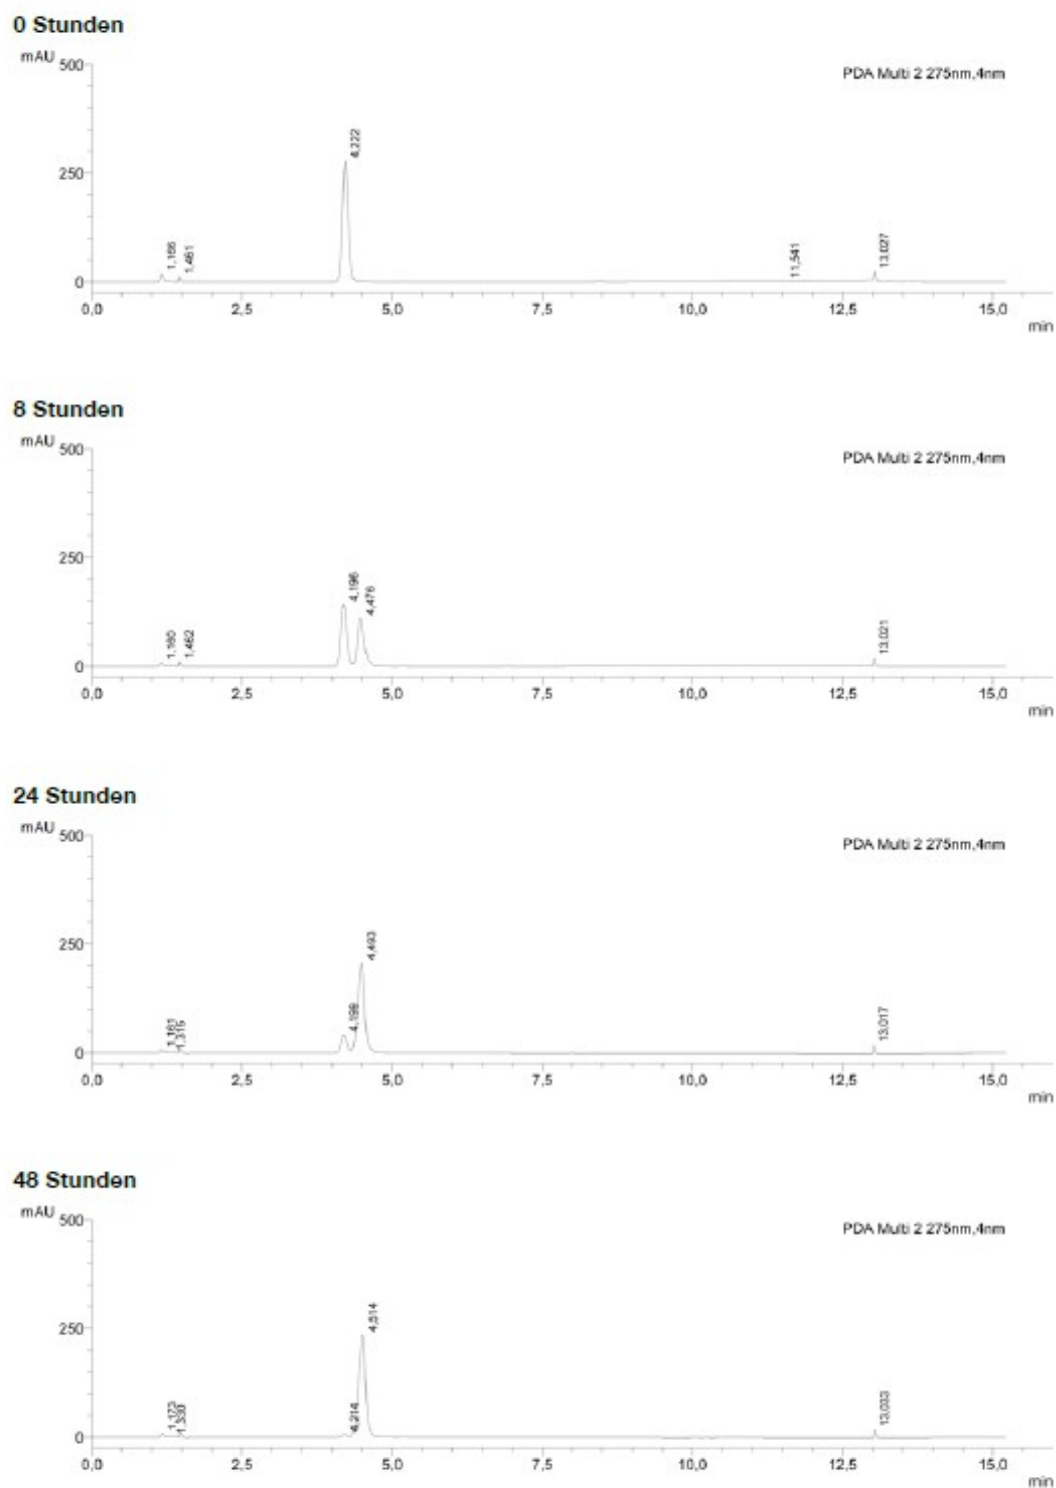

### 72 Stunden

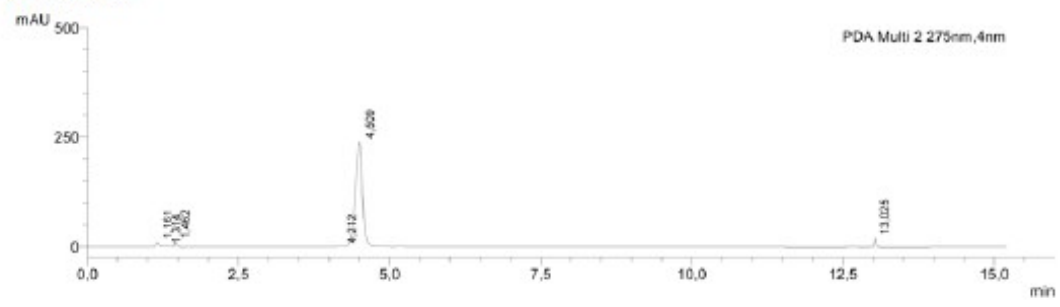

### 96 Stunden

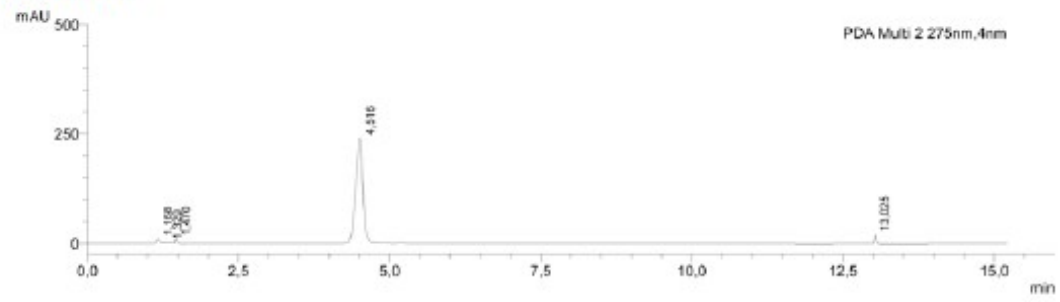

*Supporting Figure 9: Stability of 5-Cl-ASS*

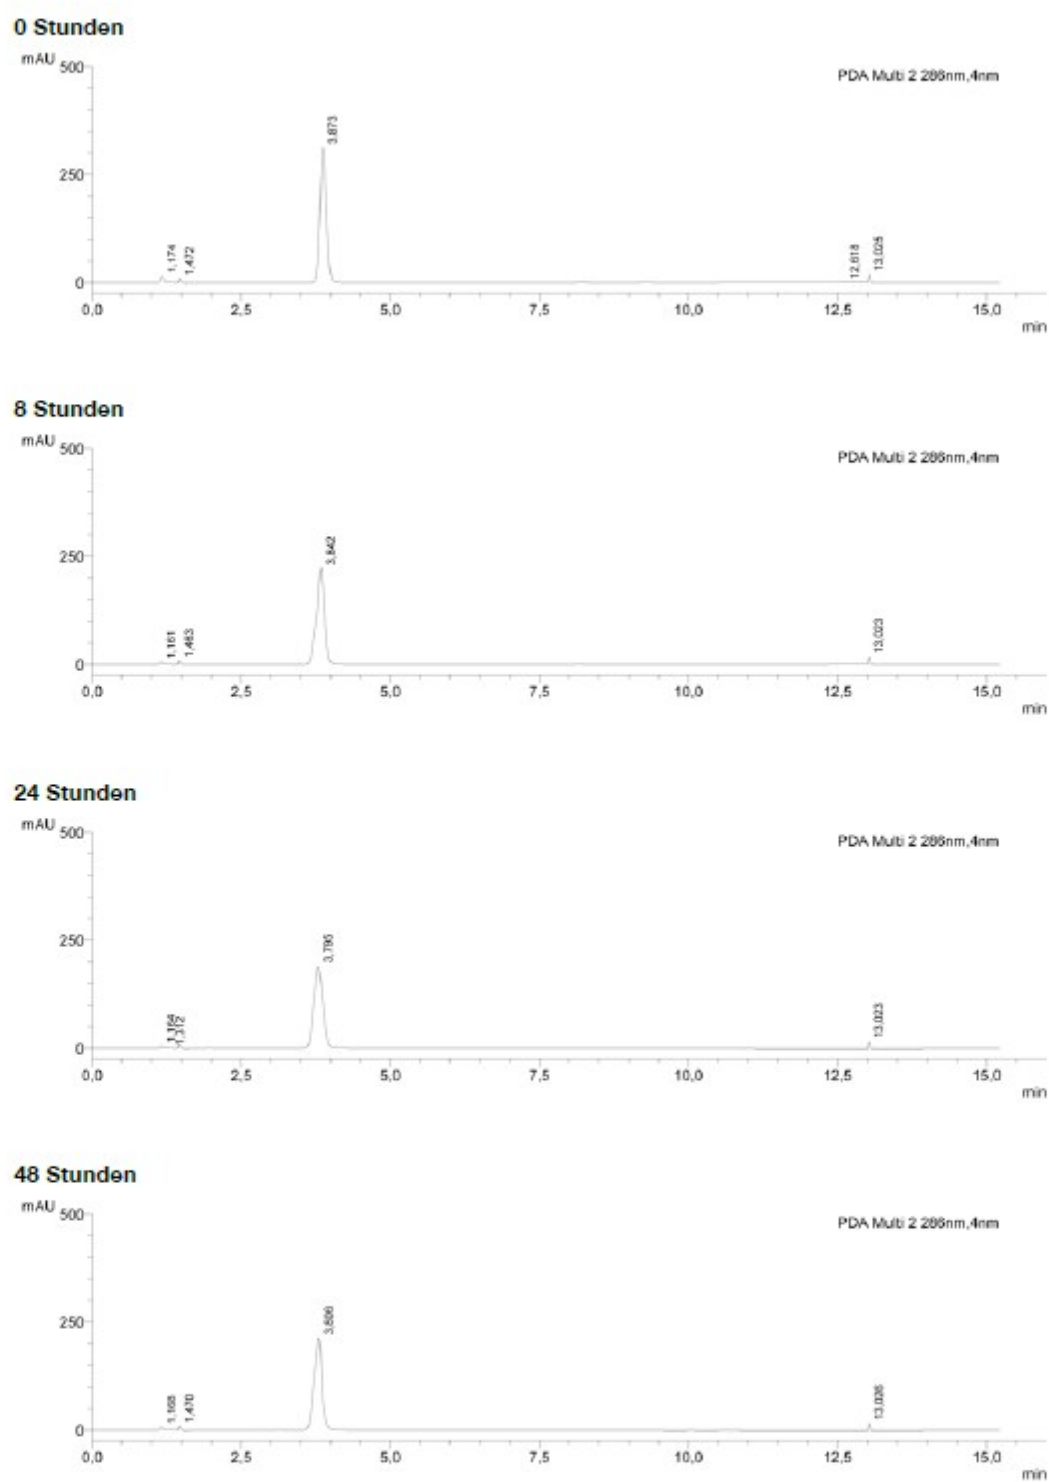



### 72 Stunden

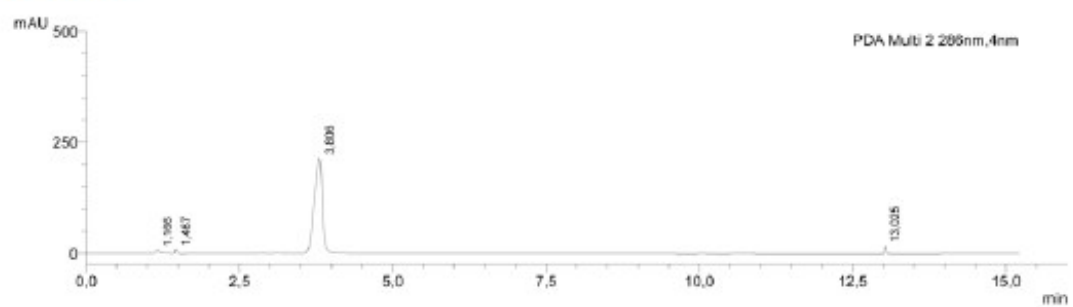

### 96 Stunden

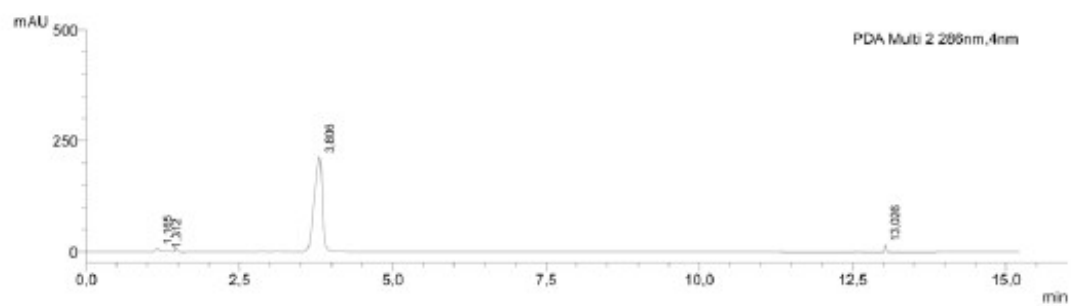

*Supporting Figure 10: Stability of 6-Cl-ASS*

**0 Stunden**

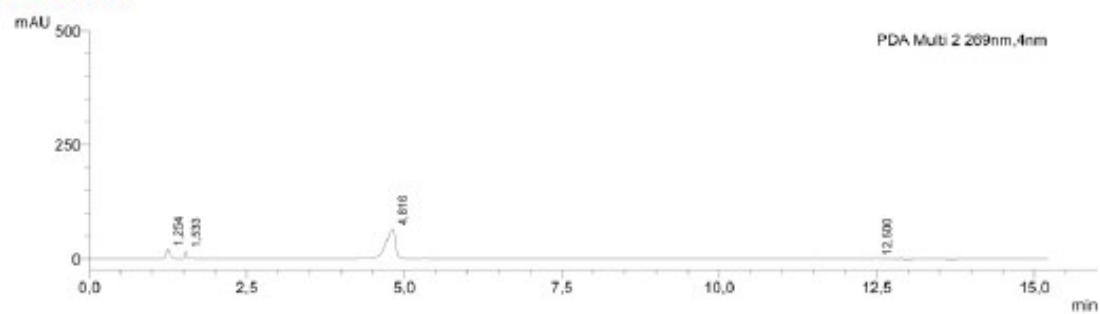

**8 Stunden**

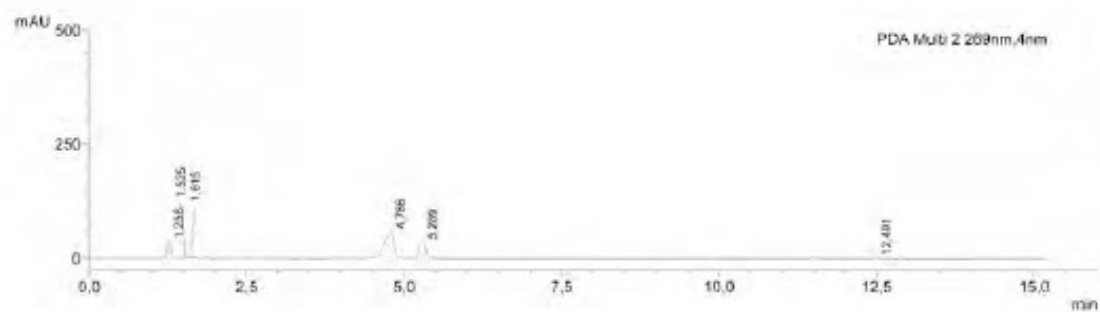

**24 Stunden**

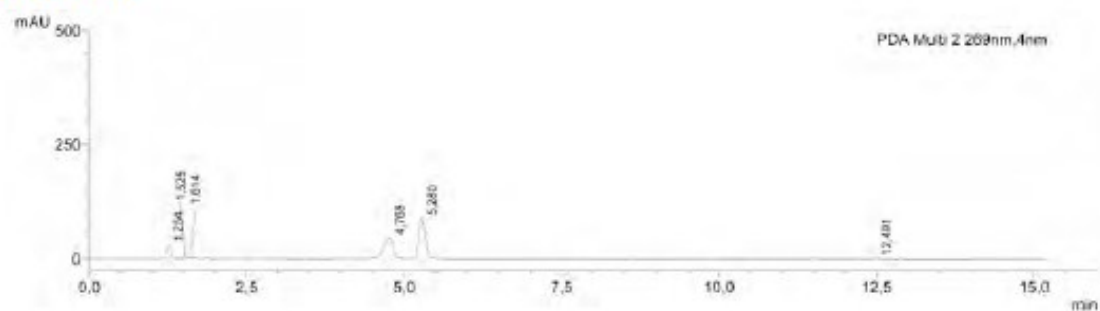

**48 Stunden**

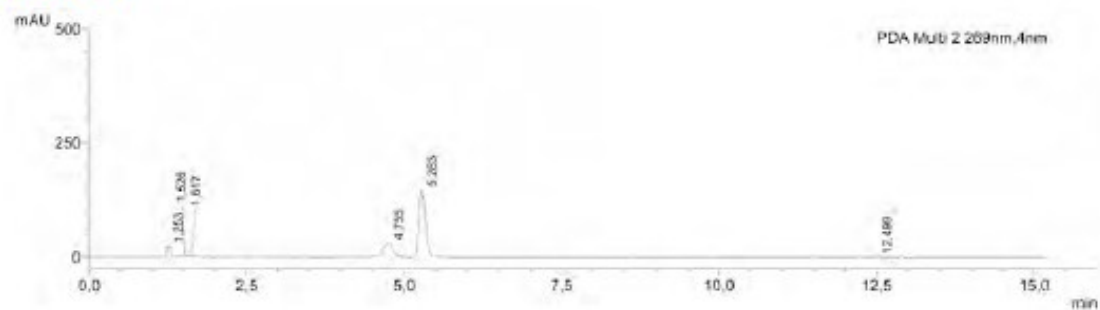

### 72 Stunden

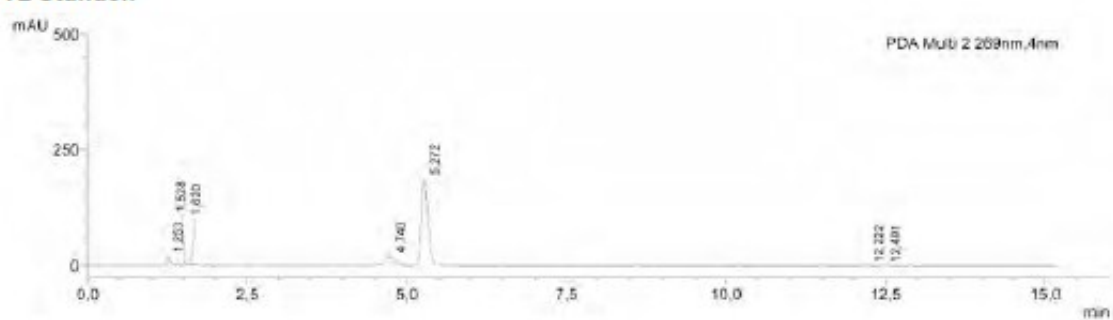

### 96 Stunden

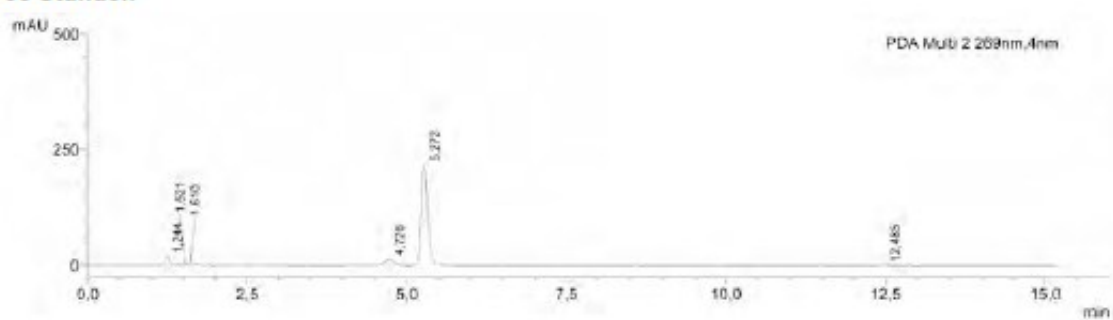

### 168 Stunden

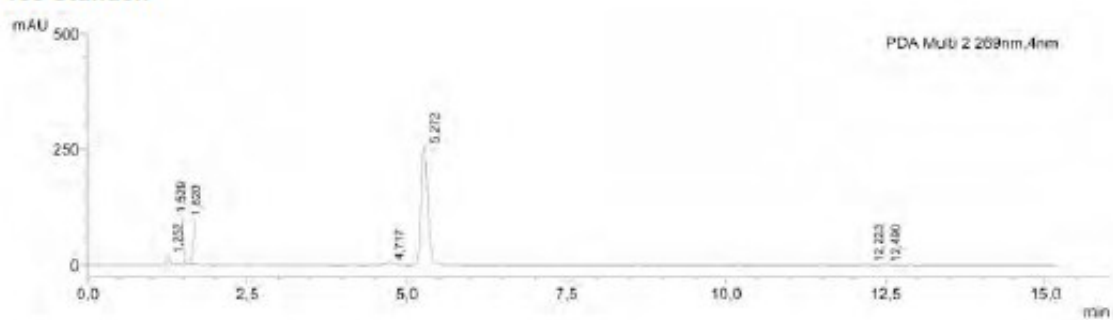

*Supporting Figure 11: Stability of 3-Cl-ASS propargyl ester*

**0 Stunden**

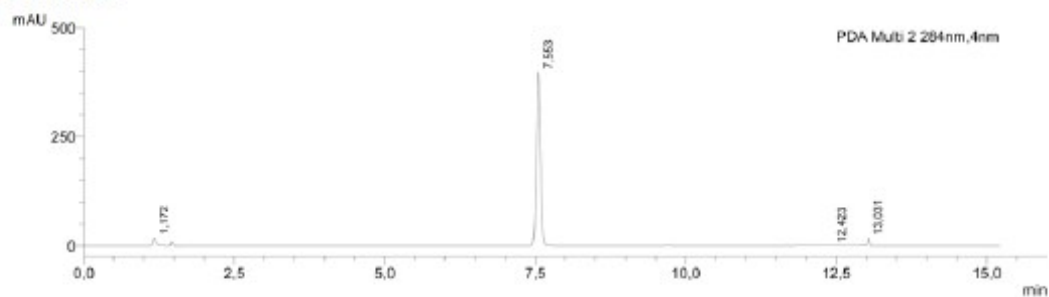

**8 Stunden**

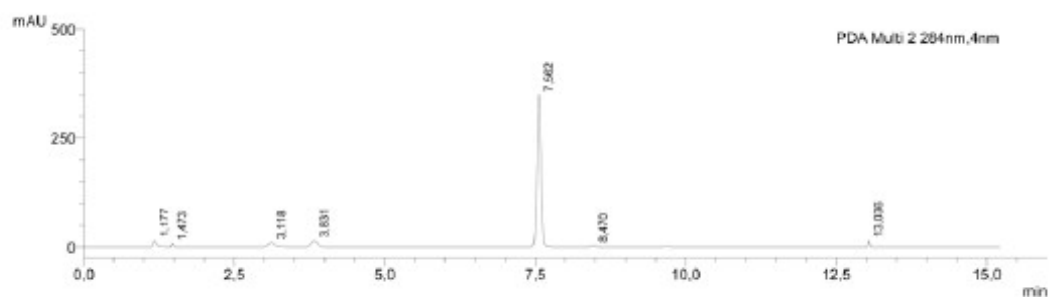

**24 Stunden**

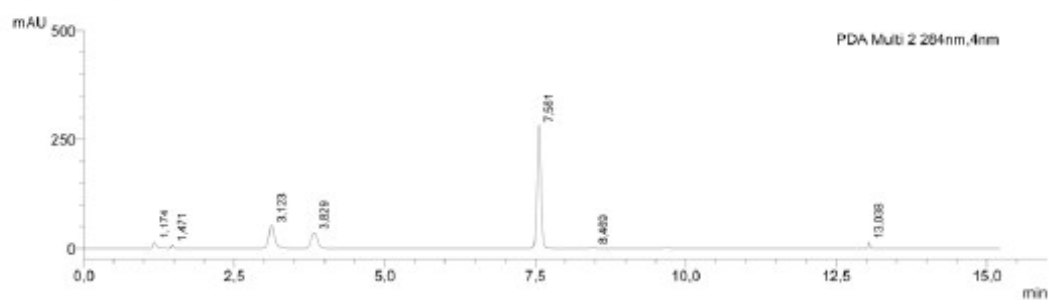

**48 Stunden**

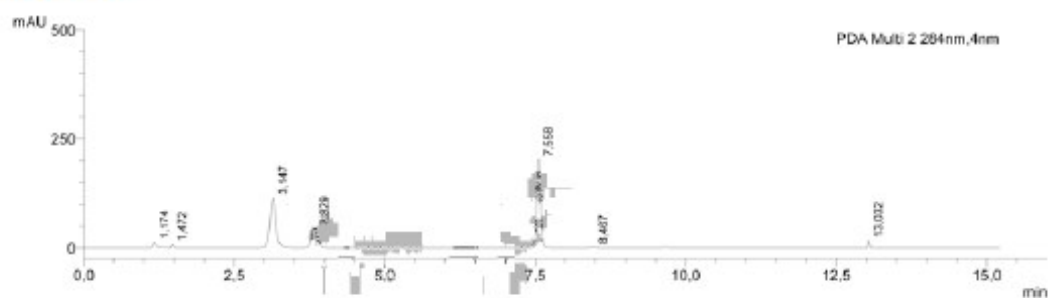

### 72 Stunden

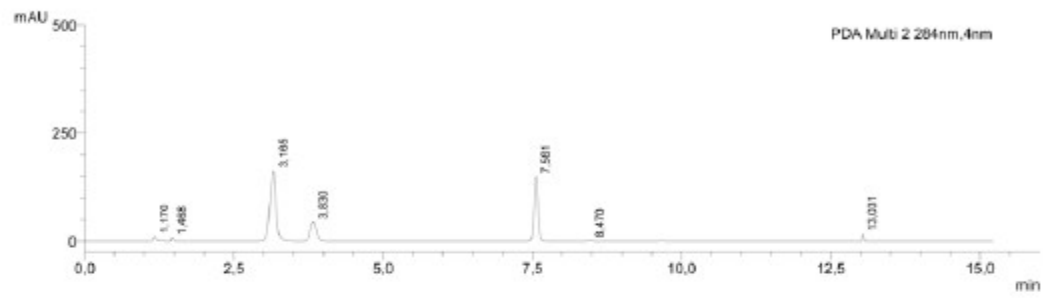

### 96 Stunden

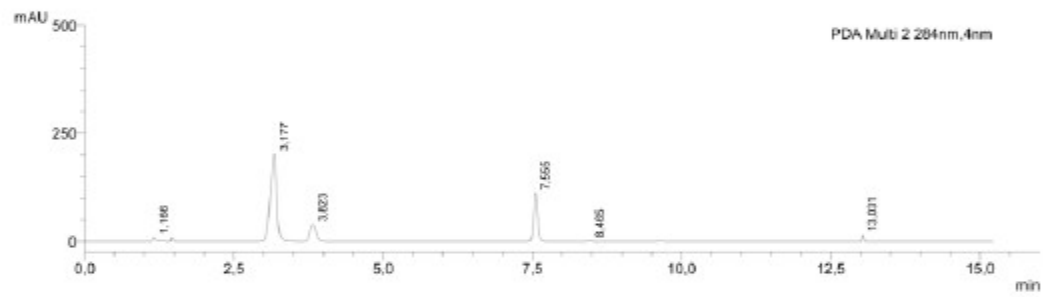

### 168 Stunden

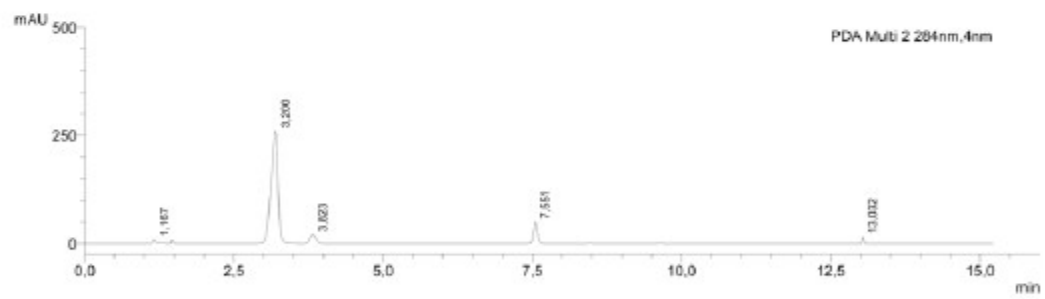

*Supporting Figure 12: Stability of 4-Cl-ASS propargyl ester*

**0 Stunden**

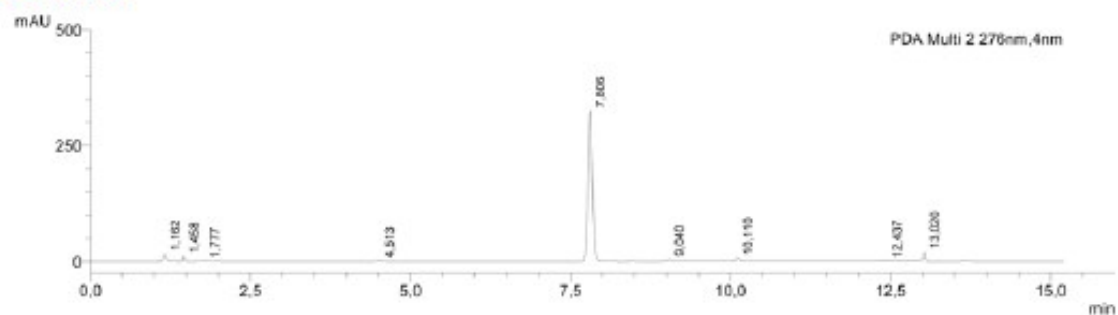

**8 Stunden**

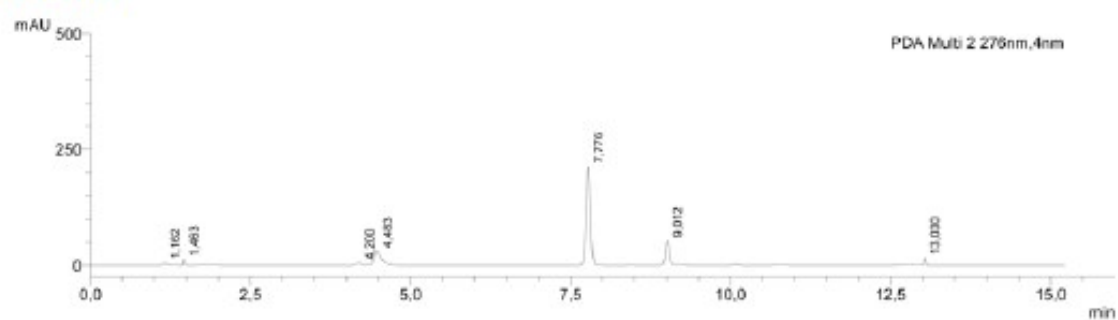

**24 Stunden**

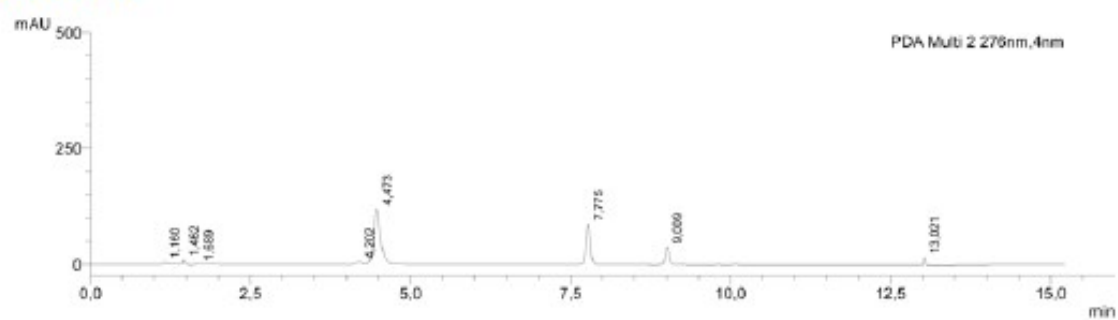

**48 Stunden**

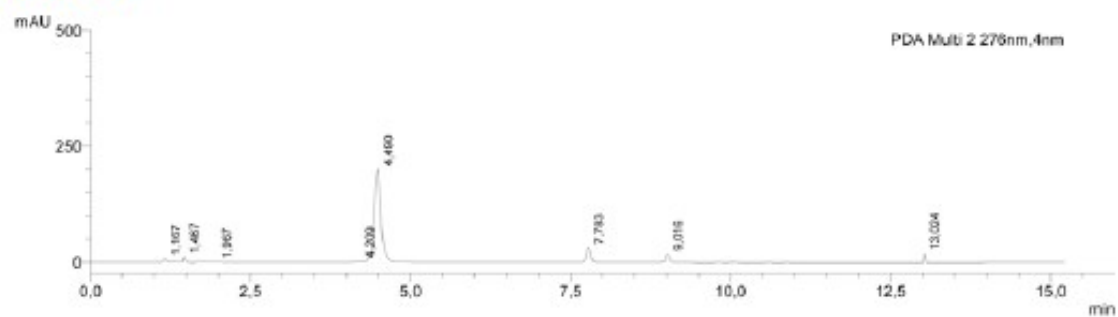

### 72 Stunden

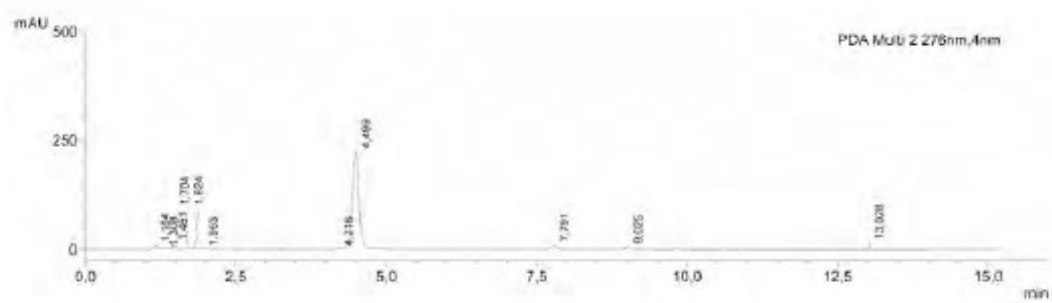

### 96 Stunden

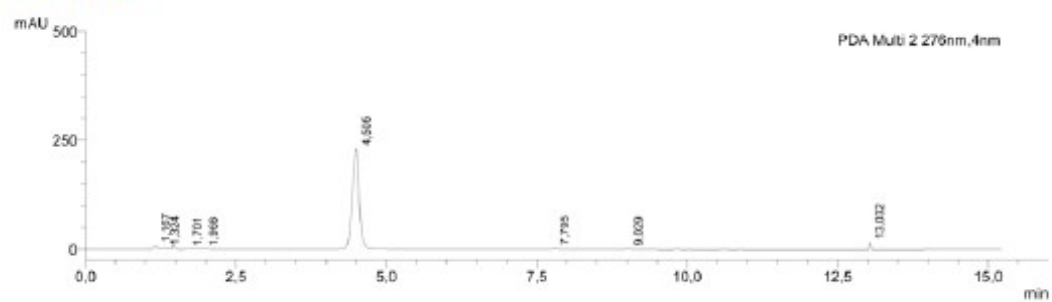

*Supporting Figure 13: Stability of 5-Cl-ASS propargyl ester*

### 5-Chloroacetylsalicylsäurepropargylester

0 Stunden

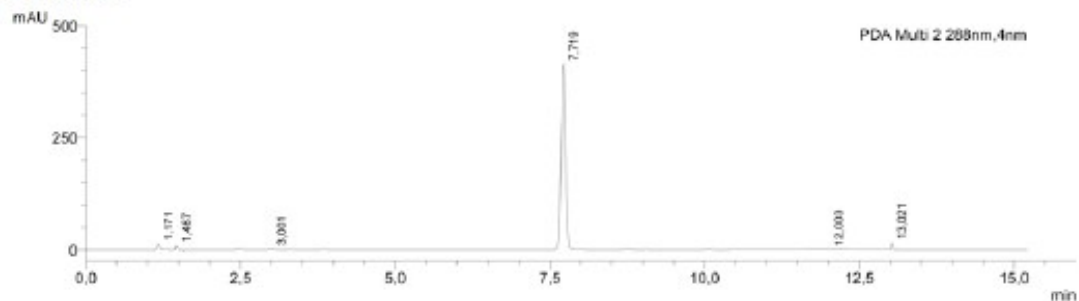

8 Stunden

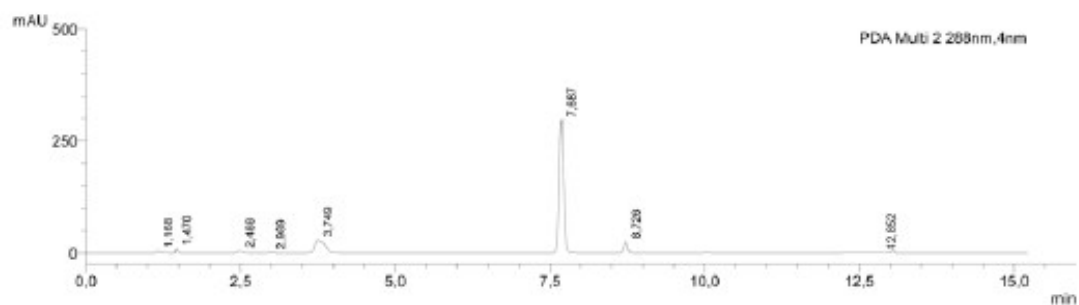

24 Stunden

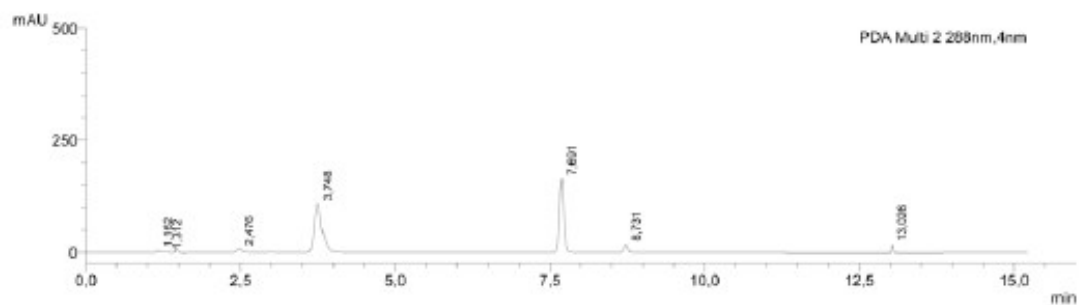

48 Stunden

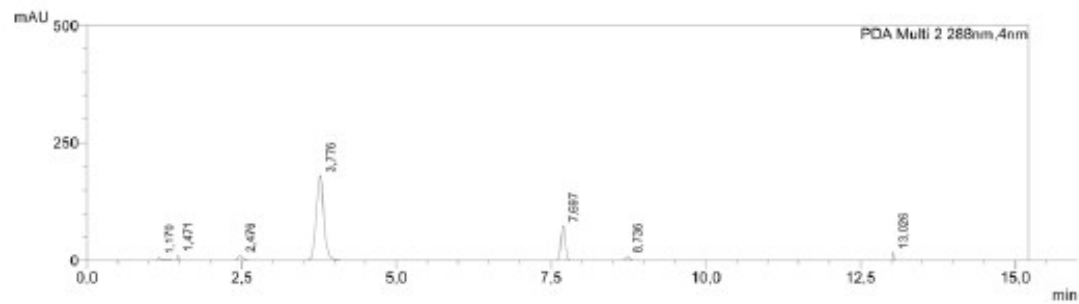



### 72 Stunden

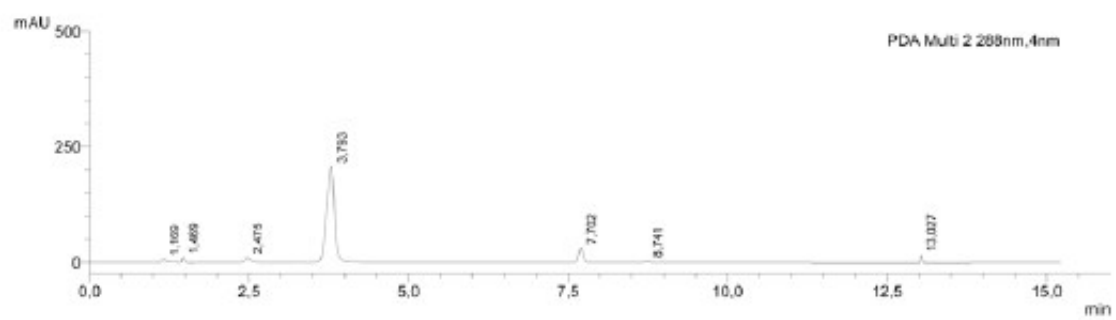

### 96 Stunden

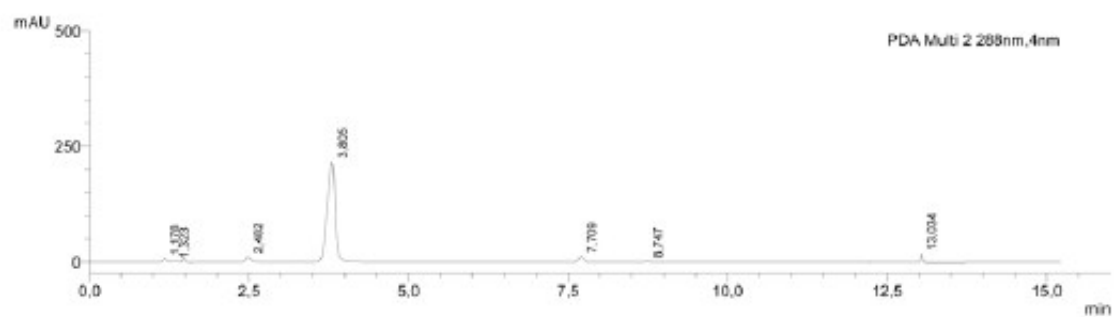

*Supporting Figure 14: Stability of 6-Cl-ASS propargyl ester*

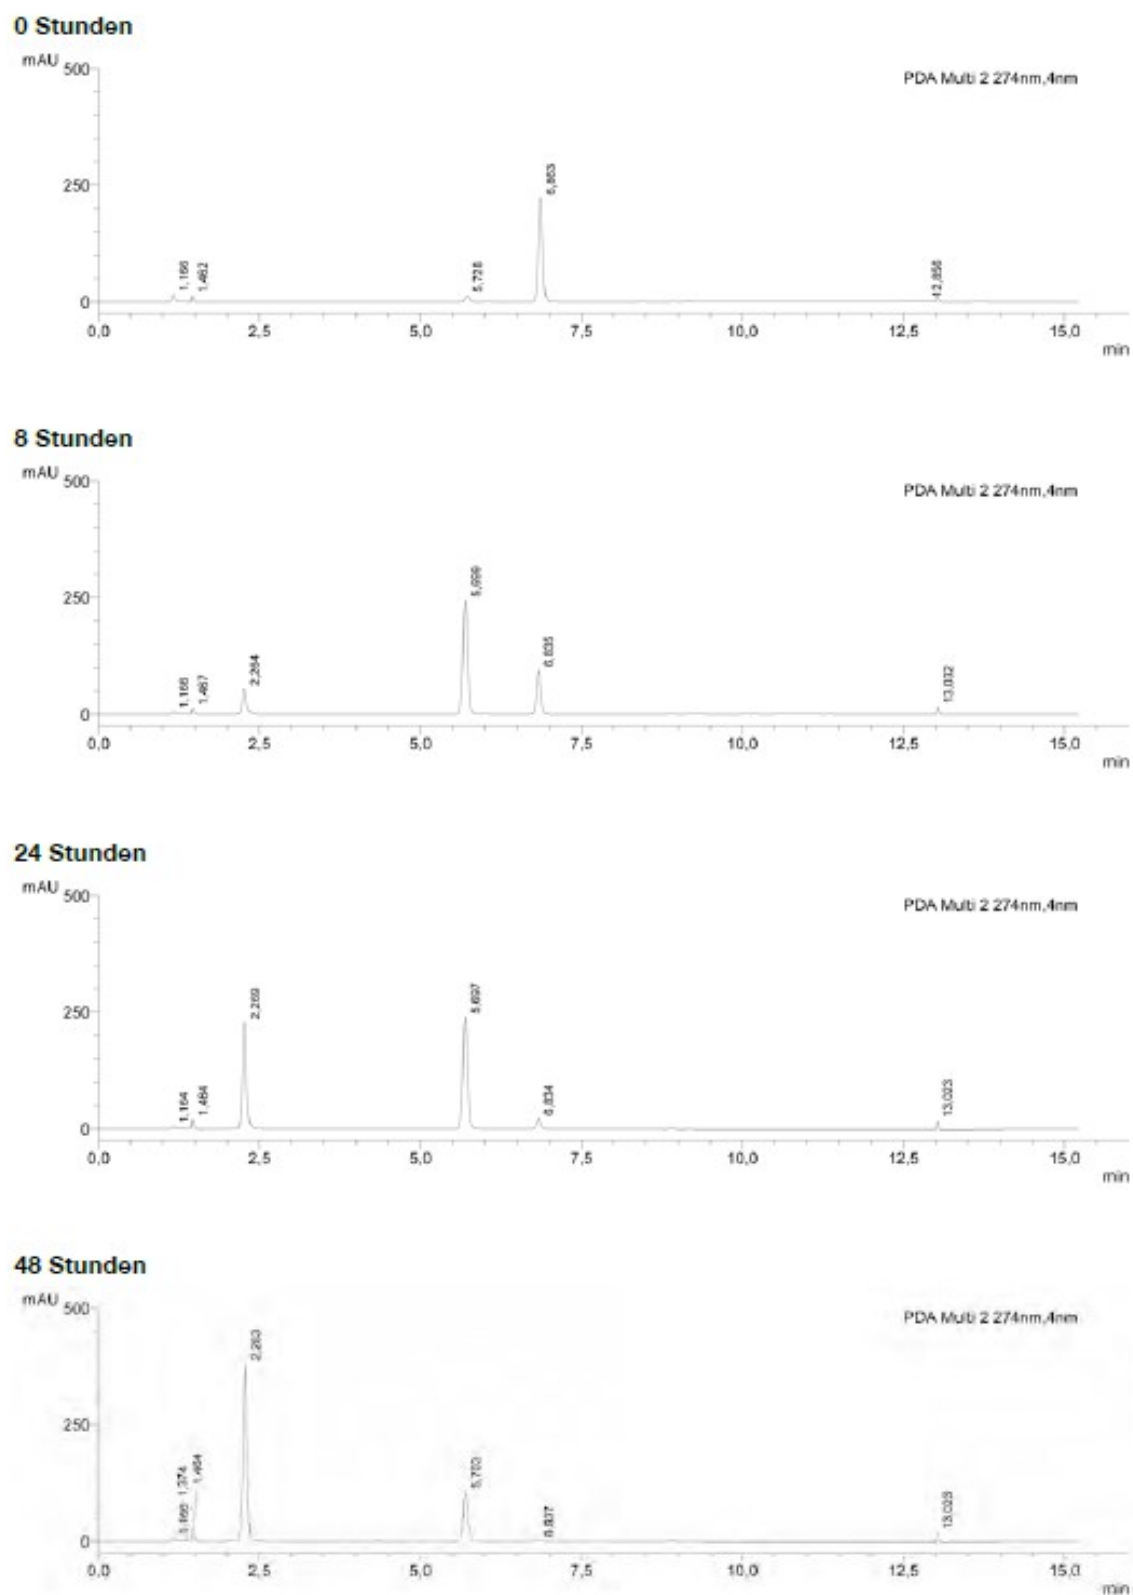

### 72 Stunden

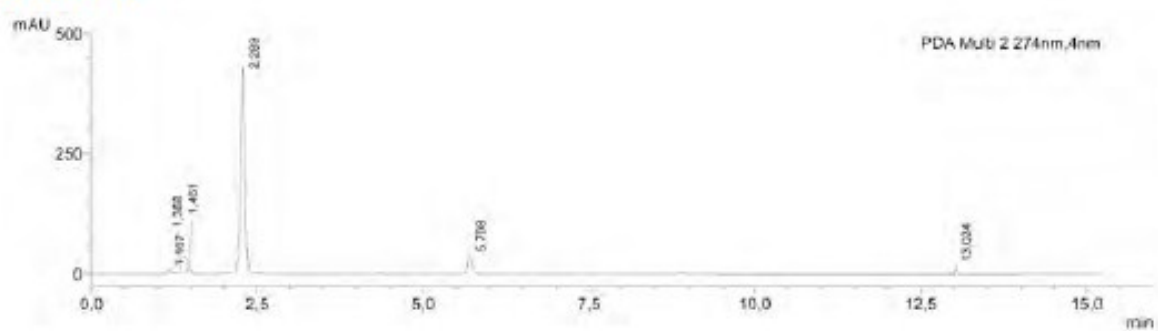

### 96 Stunden

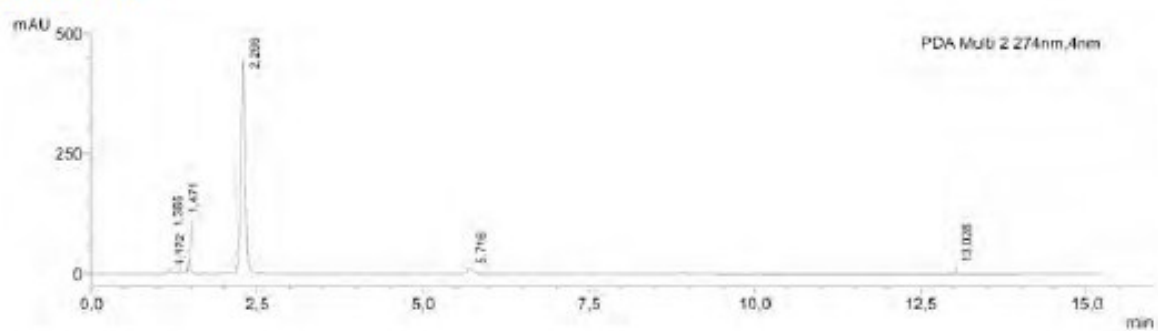

Supporting Figure 15:  $^1\text{H}$ -NMR spectrum of 3-Cl-Co-ASS

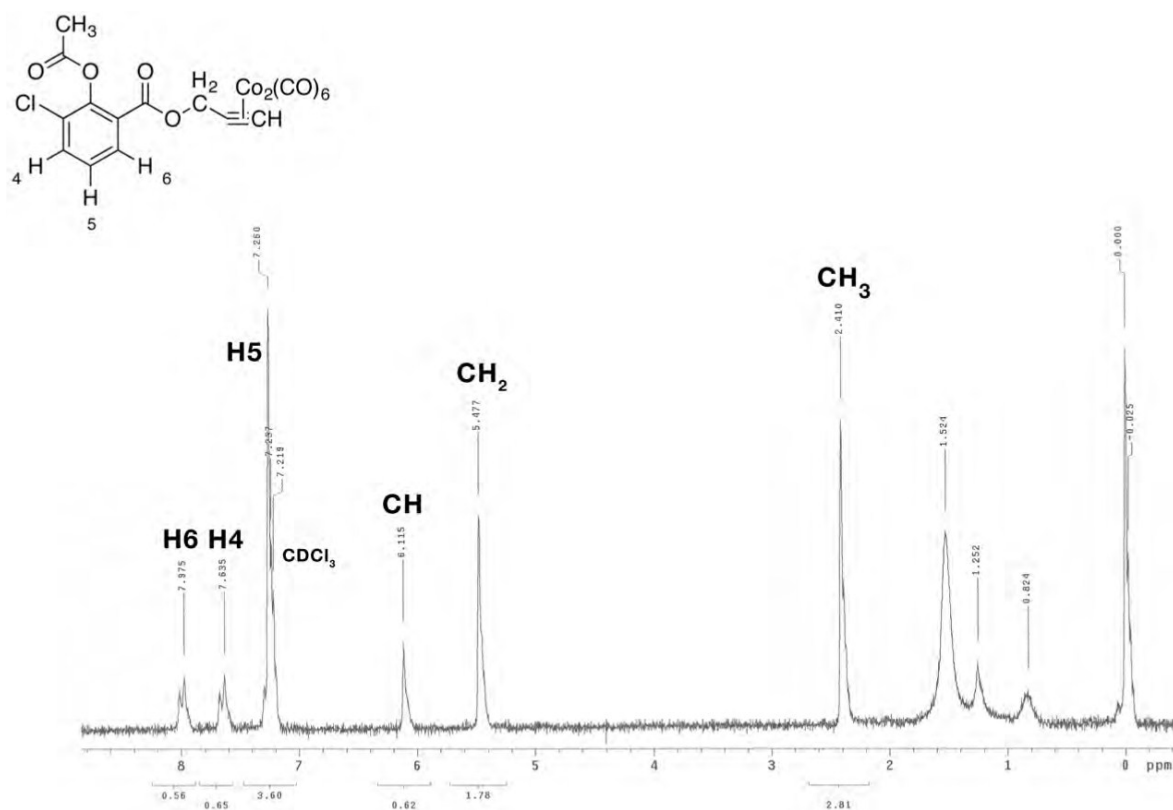

Supporting Figure 16:  $^1\text{H}$ -NMR spectrum of 4-Cl-Co-ASS

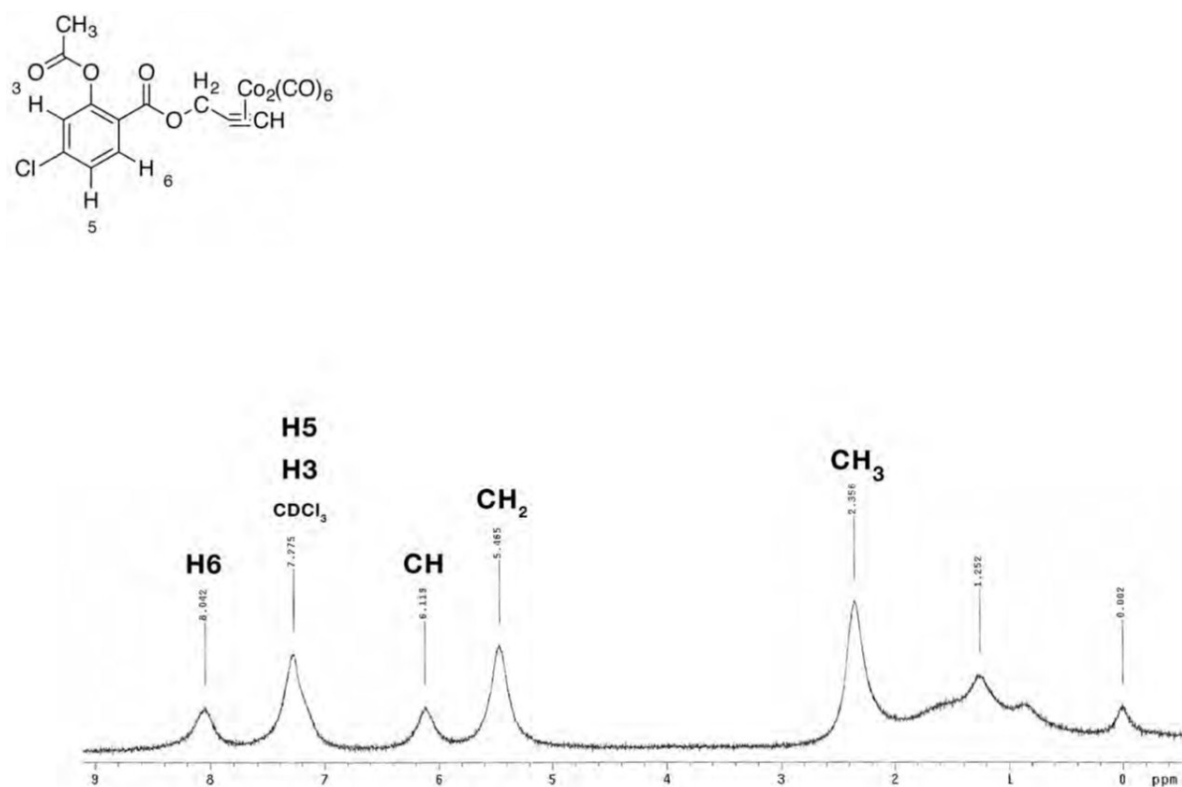

Supporting Figure 17:  $^1\text{H}$ -NMR spectrum of 5-Cl-Co-ASS

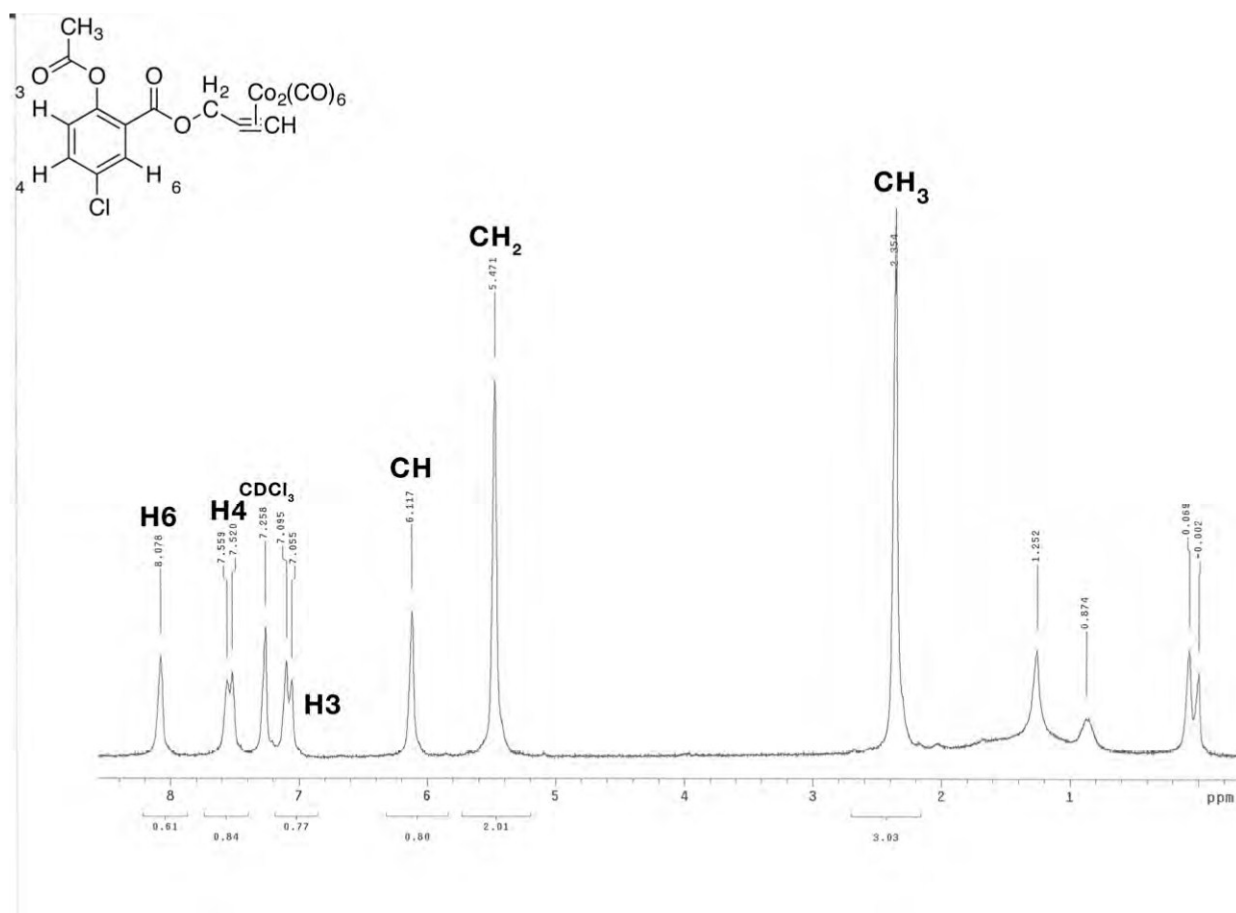

Supporting Figure 18:  $^1\text{H}$ -NMR spectrum of 6-Cl-Co-ASS

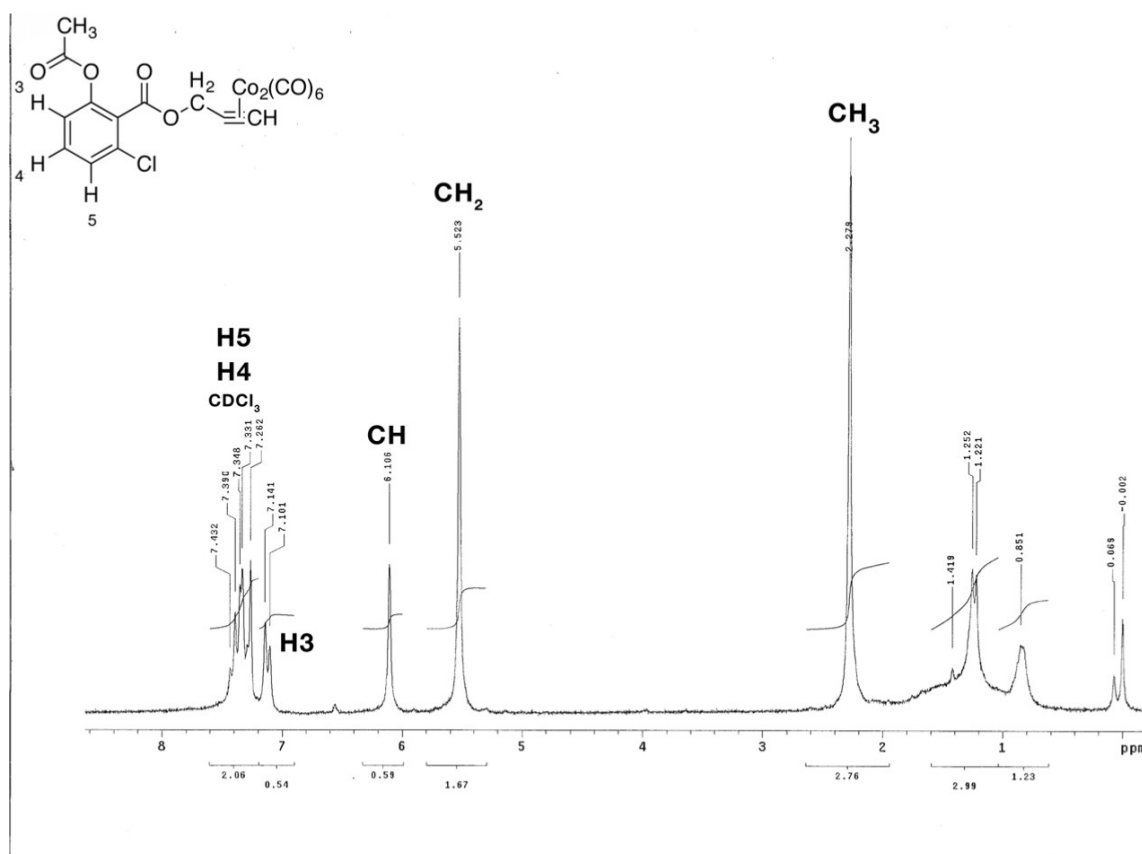

*Supporting Figure 19: HPLC chromatogram of 3-Cl-Co-ASS*

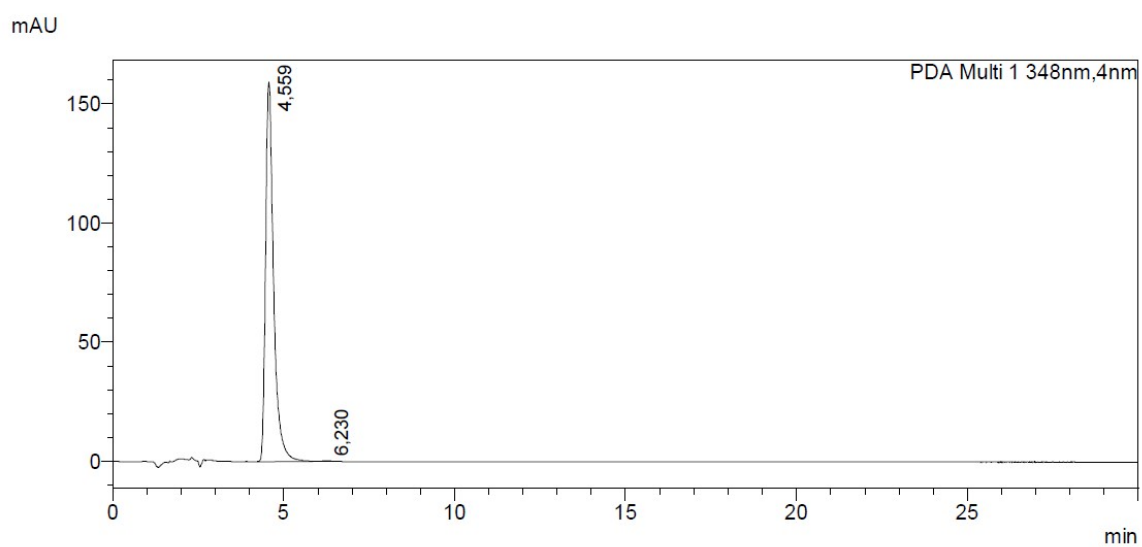

| Wavelength | Retention Time | Area    | Height | Concentration |
|------------|----------------|---------|--------|---------------|
| 348        | 4.559          | 2607625 | 159228 | 99.803        |
|            | 6.230          | 5135    | 325    | 0.196         |



*Supporting Figure 20: HPLC chromatogram of 4-Cl-Co-ASS*

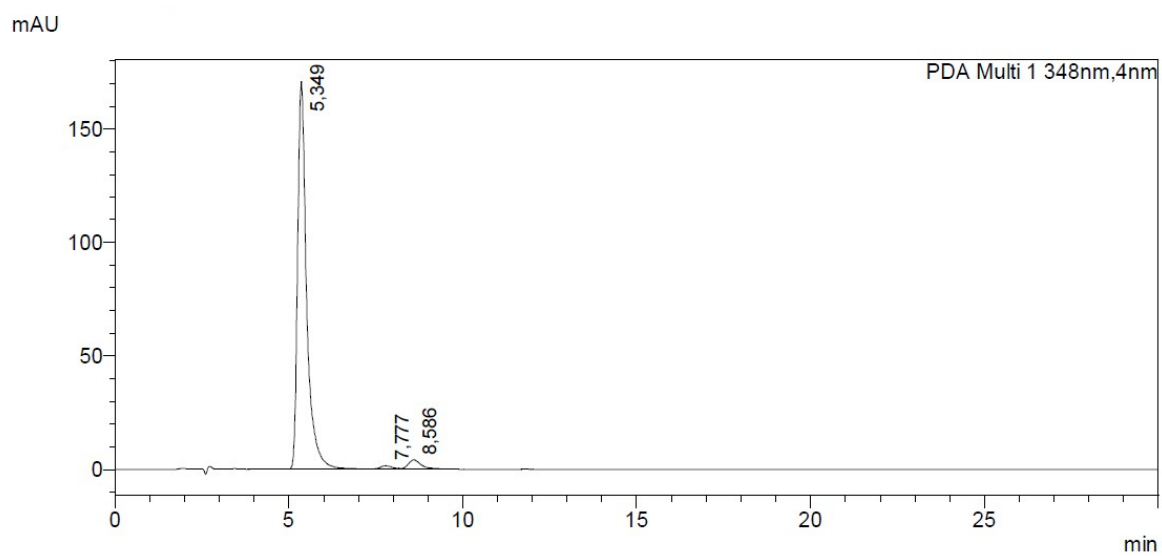

| Wavelength | Retention Time | Area    | Height | Concentration |
|------------|----------------|---------|--------|---------------|
| 348        | 5.349          | 3090301 | 170777 | 95.576        |
|            | 7.777          | 34471   | 1448   | 1.066         |
|            | 8.586          | 108547  | 4058   | 3.357         |

*Supporting Figure 21: HPLC chromatogram of 5-Cl-Co-ASS*

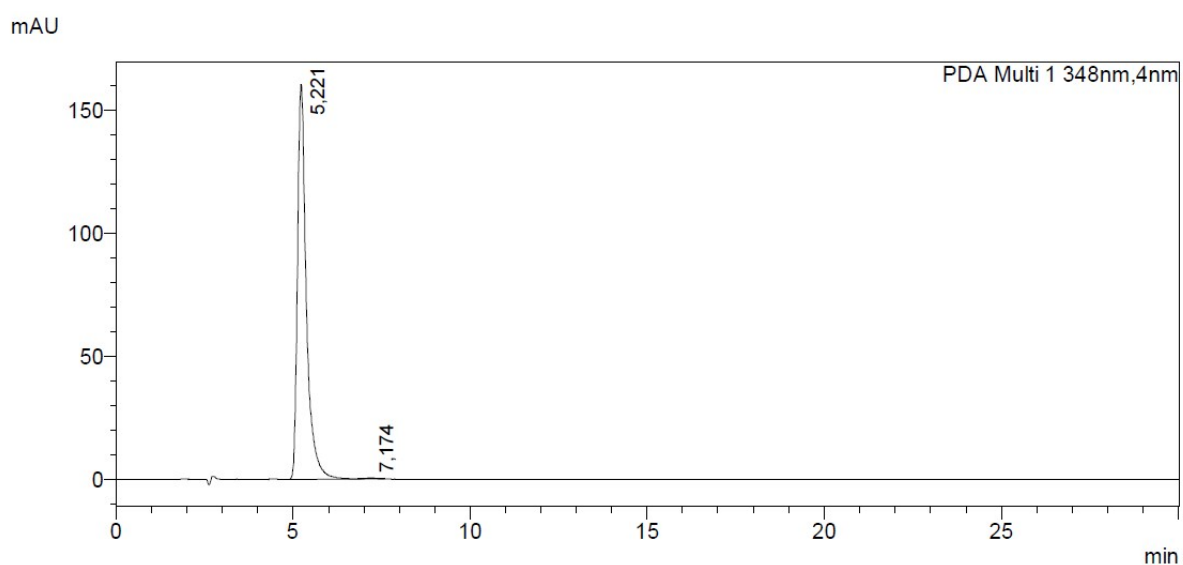

| Wavelength | Retention Time | Area    | Height | Concentration |
|------------|----------------|---------|--------|---------------|
| 348        | 5.221          | 2812359 | 160382 | 99.638        |
|            | 7.174          | 10215   | 545    | 0.361         |

*Supporting Figure 22: HPLC chromatogram of 6-Cl-Co-ASS*

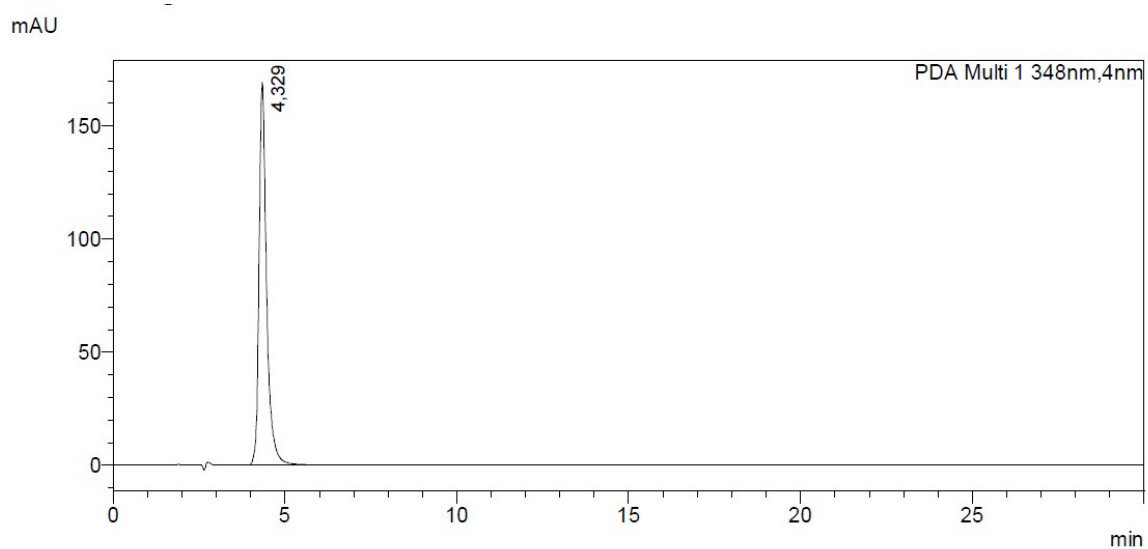

| Wavelength | Retention Time | Area    | Height | Concentration |
|------------|----------------|---------|--------|---------------|
| 348        | 4.329          | 2578456 | 169291 | 100.0         |

Supporting Figure 23: *HR-MS spectrum of 3-Cl-Co-ASS*

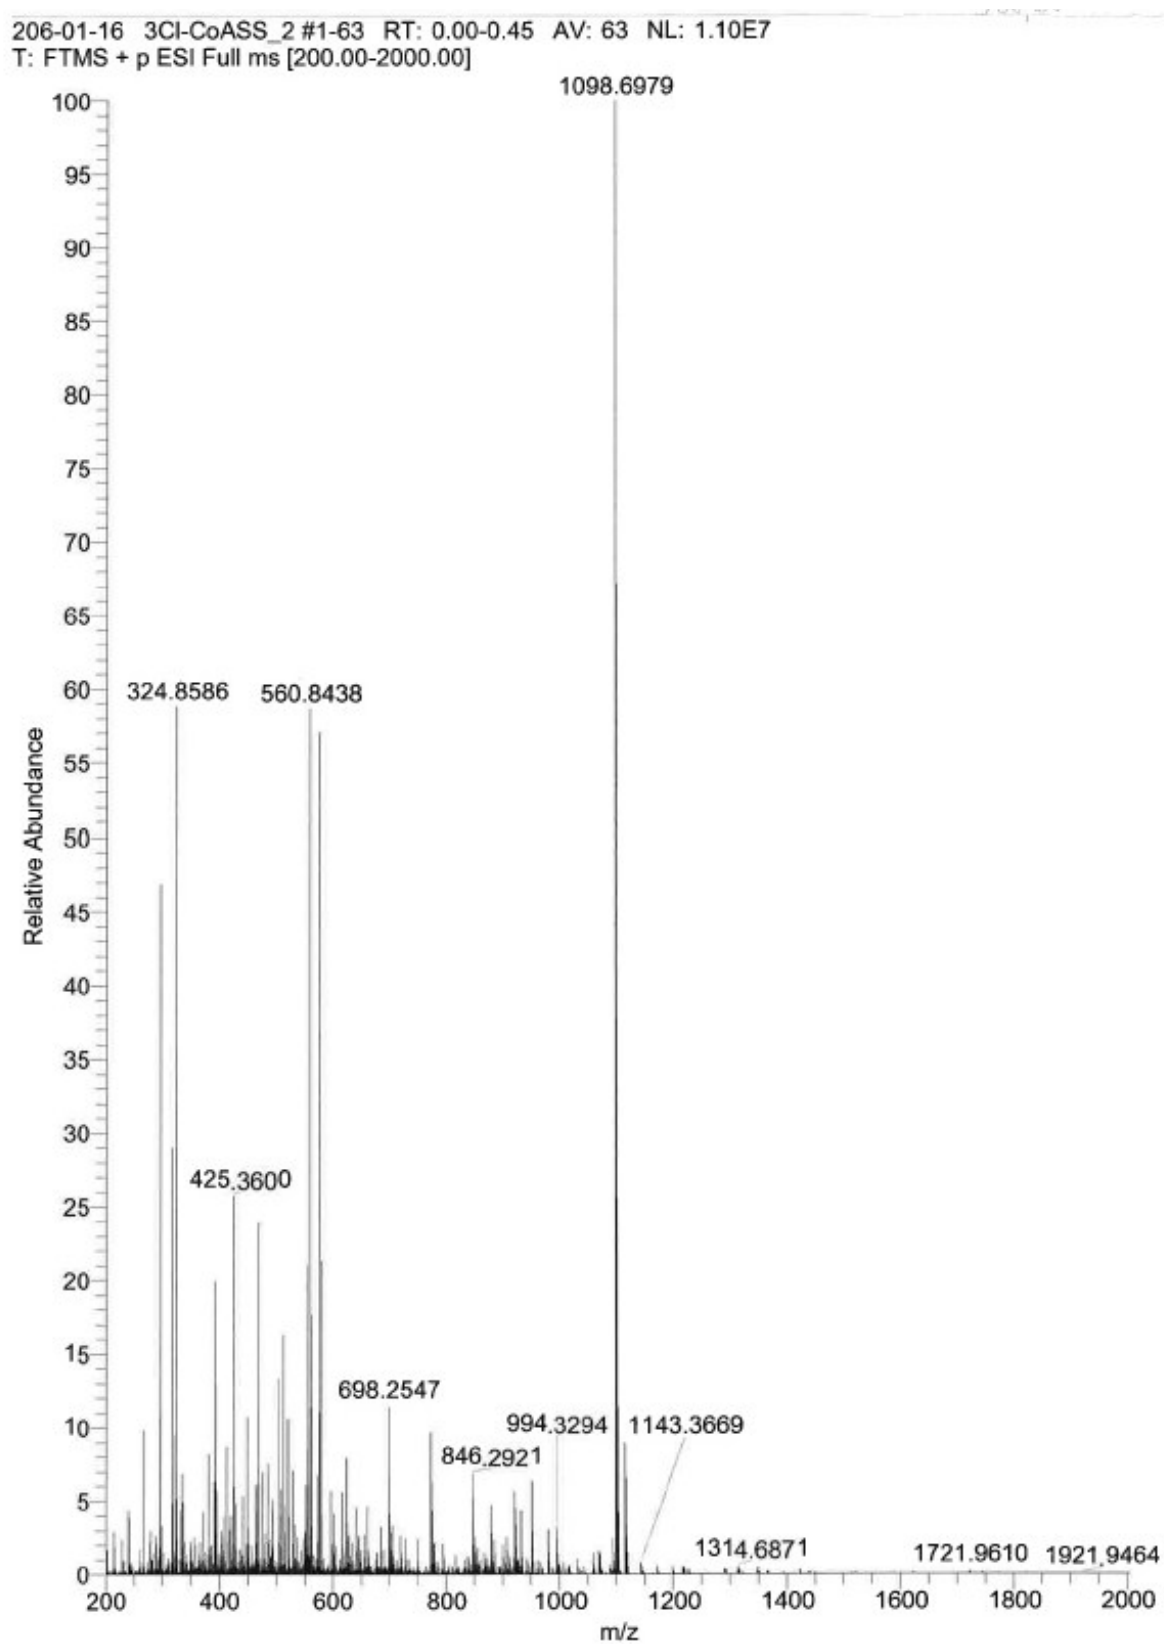

*Supporting Figure 24: HR-MS spectrum of 4-Cl-Co-ASS*

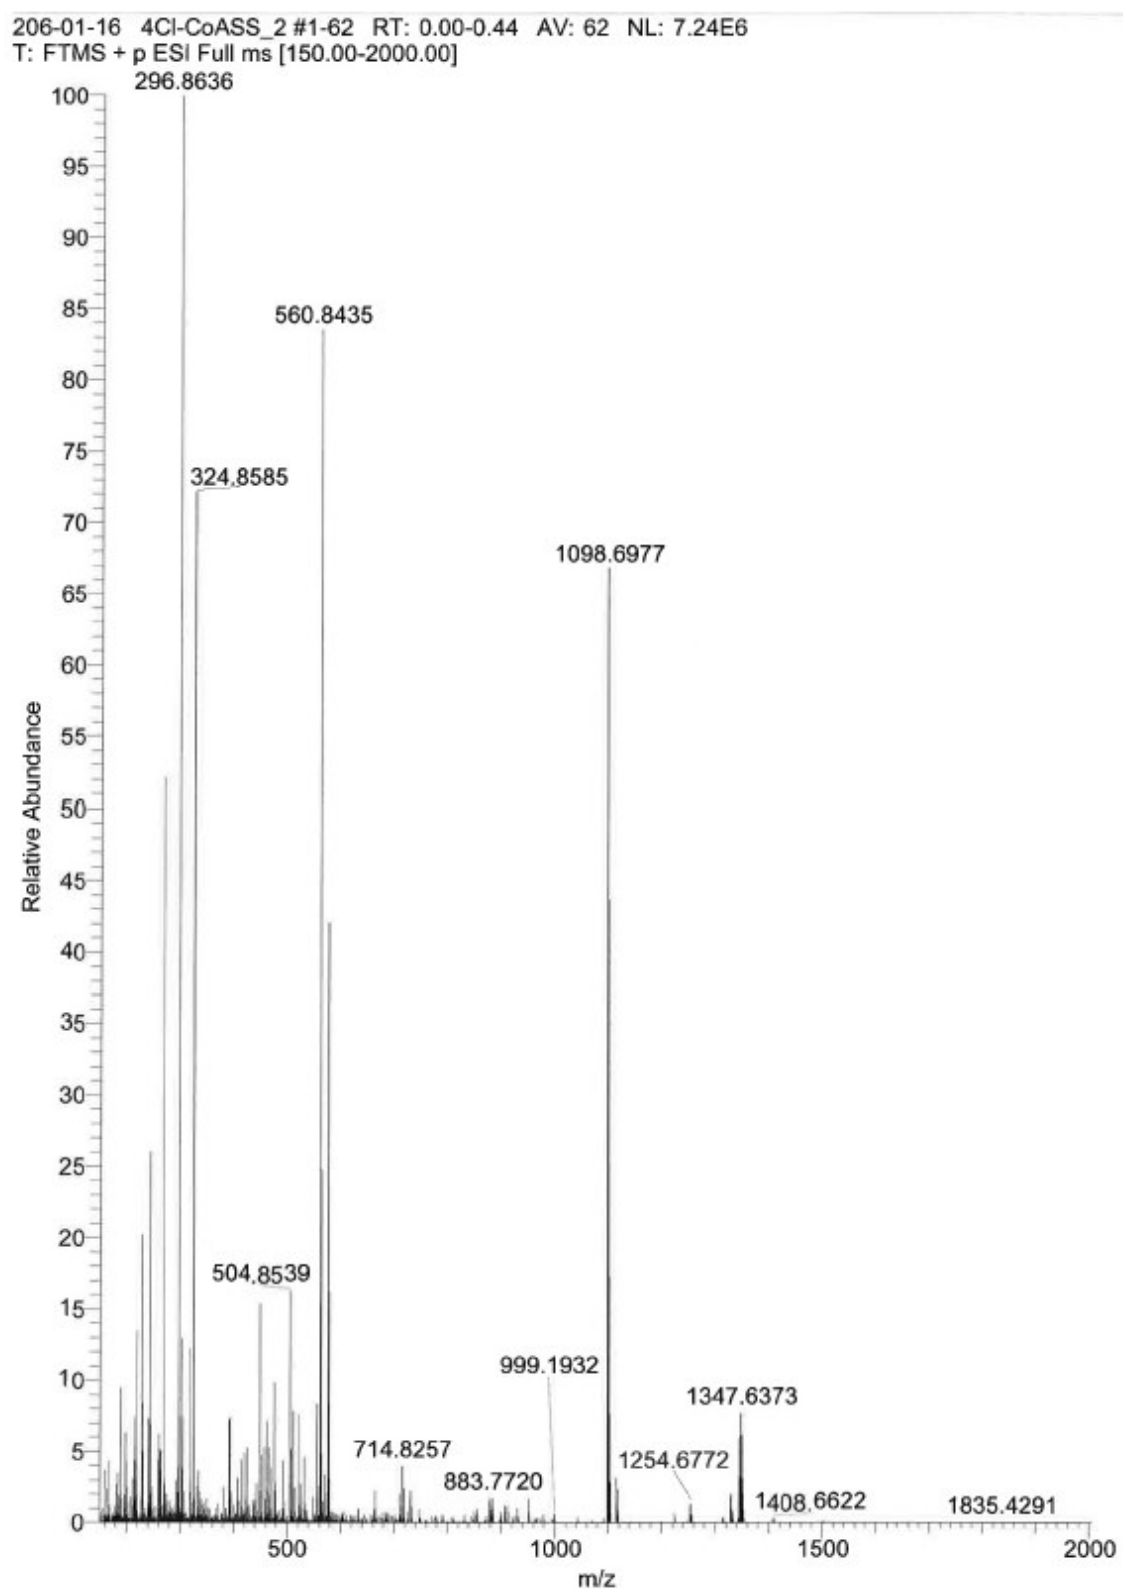

Supporting Figure 25: *HR-MS spectrum of 5-Cl-Co-ASS*

206-01-16 5Cl-CoASS\_2 #1-74 RT: 0.01-0.53 AV: 74 NL: 7.05E6  
T: FTMS + p ESI Full ms [150.00-2000.00]

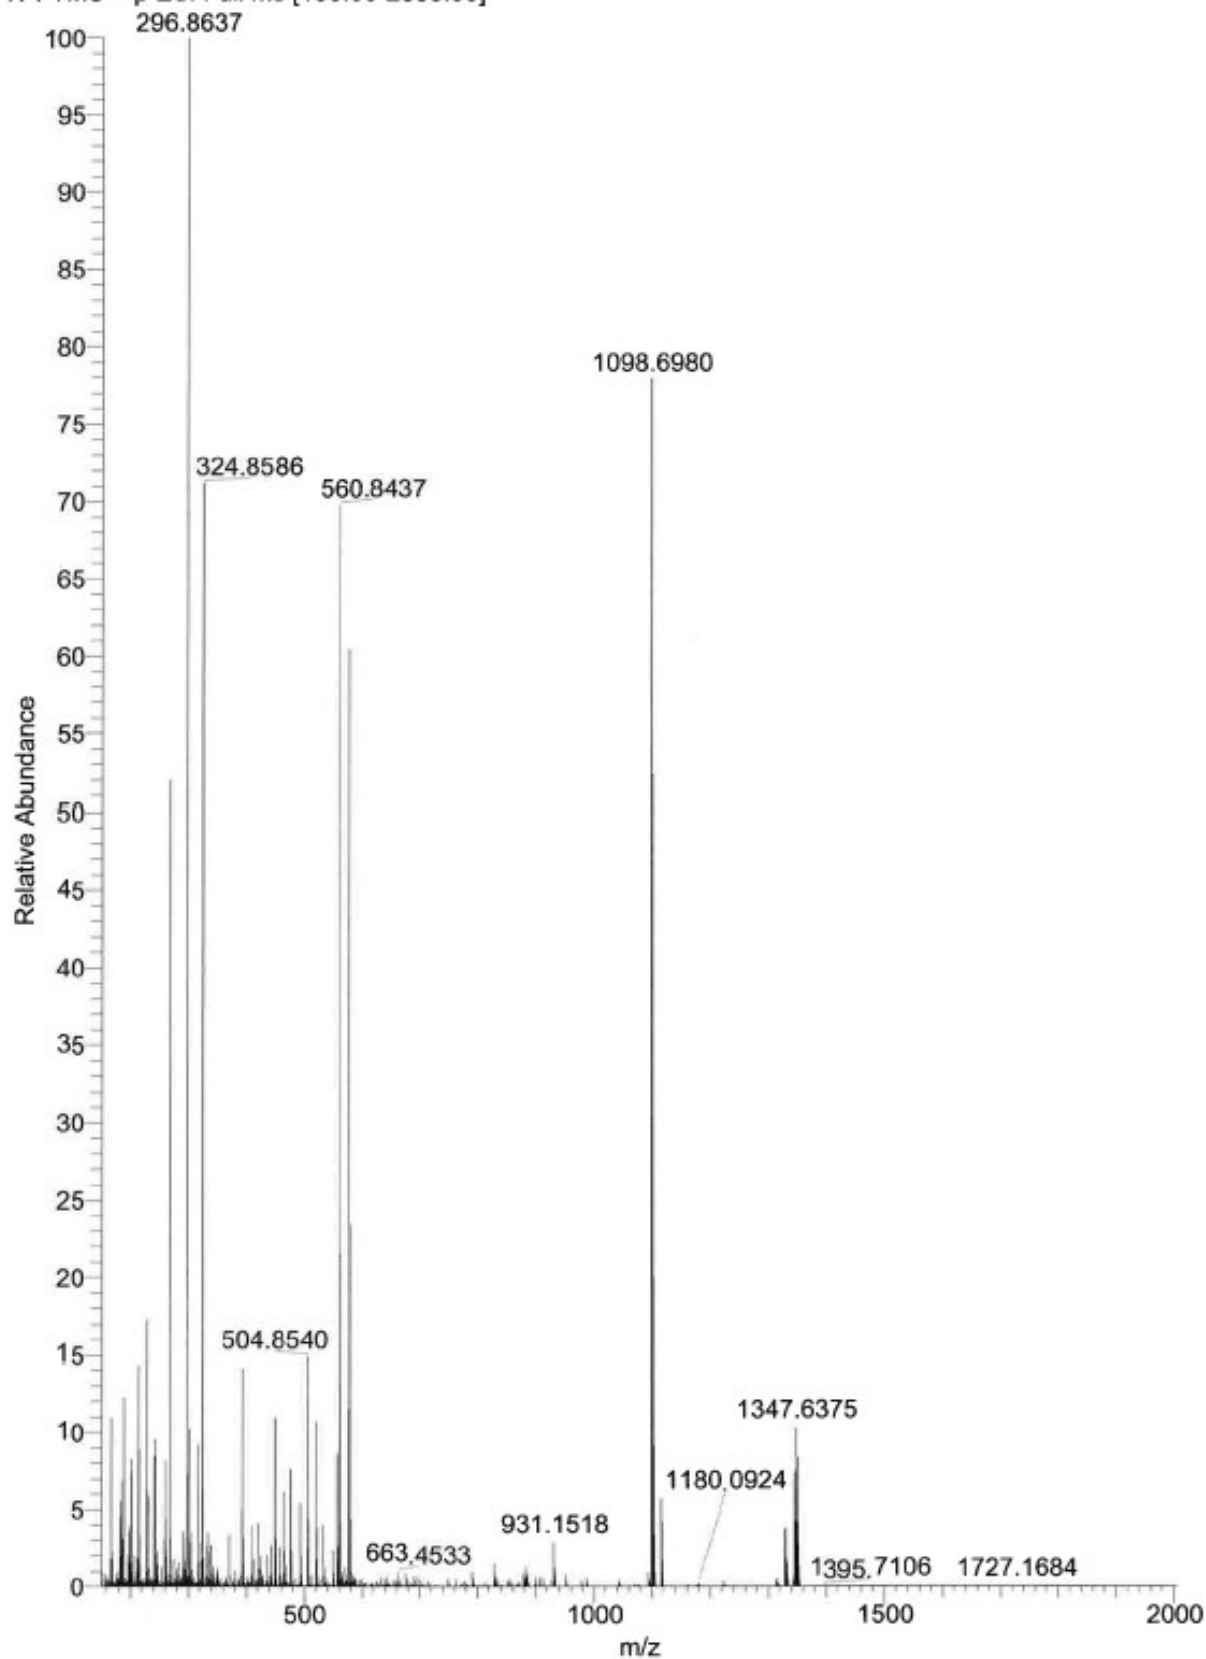

Supporting Figure 26: *HR-MS spectrum of 6-Cl-Co-ASS*

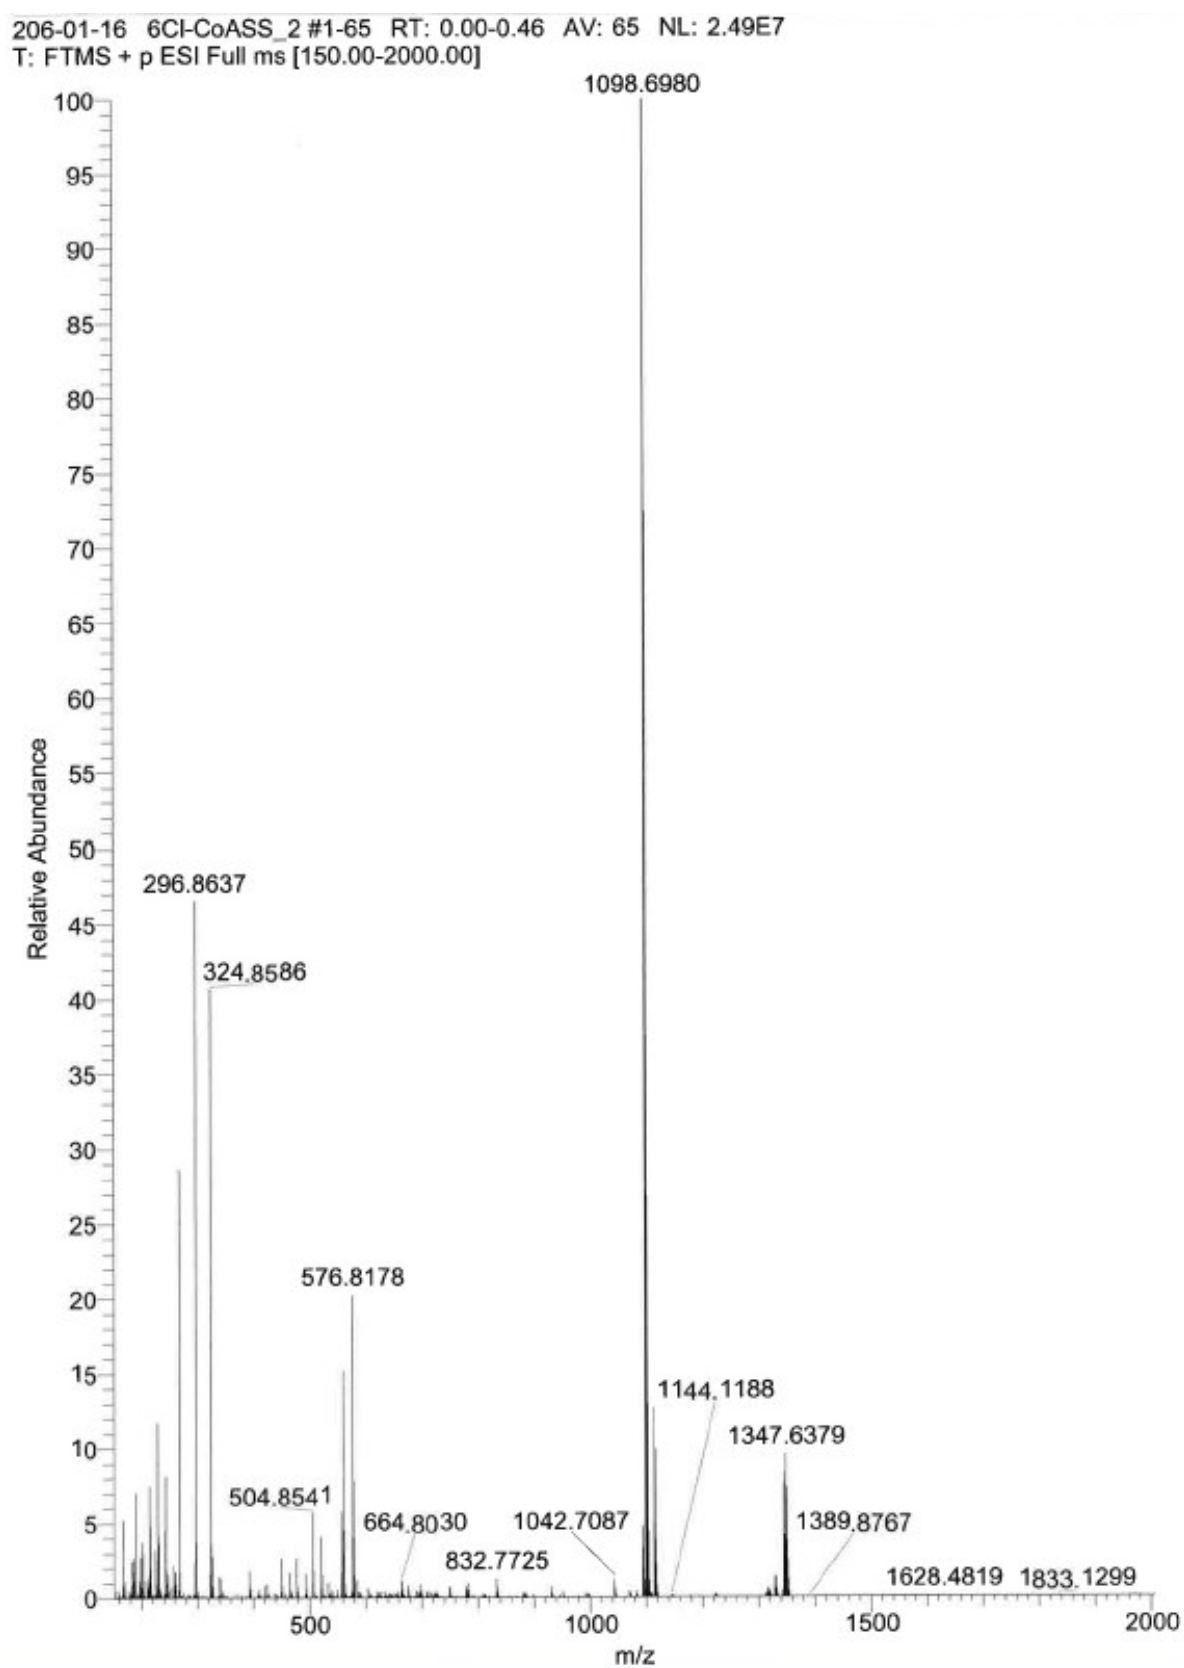

Supplement: c7dt04790h1.pdf [file c7dt04790h1.pdf]
